# Supplementary material for: Trait stacking simultaneously enhances provitamin A carotenoid and mineral bioaccessibility in biofortified Sorghum bicolor
Source: Royal Society of Chemistry journal article supplement (doi:10.1039/d2fo03606a), 2023-01-01
Supplement: d2fo03606a1.xlsx [file d2fo03606a1.xlsx]

## Sheet: TableOfContents
Table	Description
S1	Carotenoid content of uncooked, non-steeped sorghum flour
S2	Relative and absolute bioaccessibility of carotenoids from steeped or non-steeped transgenic, null segrent, and control sorghum porridges
S3	Mineral content from uncooked, non-steeped transgenic, null segrent, and control sorghum flours
S4	Inositol phosphate profiles from steeped or non-steeped transgenic, null segrent, and control sorghum flours
S5	Phytate to iron and zinc ratios for steeped and non-steeped transgenic, null segrent, and control sorghum porridges
S6	MRM parameters used for quantifying phytate and phytate metabolites
	All data are reported as means ± standard deviation and different letters indicate statistical significance as determined by a Tukey’s HSD (α = 0.05) posthoc test

## Sheet: S1
Event Identifier	Transgene State	Lutein	Zeaxanthin	13cisAlphaCryp	AlphaCryp	CombACryp	BetaCryp	15cisBetaCaro	13cisBetaCaro	AlphaCaro	BetaCaro	9cisBetaCaro	cisBetaCaro	Lycopene	Xanthophylls	Carotenes	ProvitaminA
ABS4-1A	Present	192.2±3.6ab	194.2±2.7a	8.9±1.4a	9.2±3.1ab	18.1±1.7abc	9.9±2.2a	5.2±4.2a	31.8±4.2a	17.7±2.0ab	581.2±6.1c	nd	36.70±8.77a	10.3±1.1d	414.4±9.4a	646.0±6.8c	622.4±5.3b
ABS4-1B	Present	201.3±6.9a	152.7±3.3bc	3.6±0.8abc	15.9±0.8a	19.5±1.6a	11.5±1.9a	8.2±0.4a	29.1±2.6a	16.1±0.5b	614.7±13.6b	nd	37.35±3.01a	7.6±0.7e	385.1±6.7ab	675.8±17.0bc	657.0±13.8b
ABS4-1C	Present	193.6±4.9ab	162.2±7.0b	8.3±5.8ab	3.2±3.3b	10.6±7.2abcde	9.4±0.7a	6.5±0.8a	30.8±1.2a	15.5±0.6b	624.9±22.6b	nd	37.23±1.43a	8.5±1.1e	375.8±12.1b	686.1±22.7bc	661.3±22.4b
ABS4-2A	Present	183.3±8.6b	126.3±4.2d	2.0±0.7c	19.1±1.4a	20.6±1.0a	8.4±4.0a	8.2±2.4a	18.7±1.6c	36.7±1.4a	606.4±20.9bc	nd	26.88±4.00ab	24.7±0.6b	338.7±15.5c	694.7±24.4b	652.7±24.0b
ABS4-2B	Present	189.2±6.6ab	149.9±0.4c	2.4±0.9bc	16.4±13.2a	18.4±14.8ab	10.1±7.9a	6.1±9.0a	26.5±5.7ab	28.6±24.9ab	850.7±13.4a	nd	31.94±15.13ab	28.6±0.7a	366.7±30.5bc	939.5±42.1a	894.6±32.7a
ABS4-2C	Present	144.0±4.2c	127.9±5.7d	3.0±0.4abc	12.9±1.0ab	15.9±1.0abcd	8.2±0.5a	0.9±0.0a	16.8±1.0c	22.3±1.3ab	505.5±14.6d	nd	16.75±1.01bcd	22.1±0.2c	295.9±10.0d	566.7±16.9d	537.1±15.9c
ABS4-2D	Present	133.5±8.8c	134.2±2.3d	3.5±0.9abc	10.2±1.8ab	13.7±0.9abcde	10.2±0.6a	2.7±3.2a	20.5±0.9bc	23.9±0.3ab	599.5±12.3bc	nd	22.67±4.42abc	25.7±1.0b	291.7±12.5d	671.7±7.7bc	634.7±10.6b
ABS4-1A	Null	72.6±2.8d	93.2±3.6e	4.8±3.0abc	nd	4.8±3.0cde	nd	nd	nd	nd	20.8±0.4e	6.67±1.09a	6.91±0.88d	nd	170.2±8.3e	28.1±1.2e	26.6±1.1d
ABS4-1B	Null	73.6±2.2d	75.9±2.3f	5.0±0.3abc	nd	5.0±0.3bcde	nd	nd	nd	nd	21.3±0.5e	6.17±0.45ab	6.35±0.52d	nd	154.6±3.8ef	28.2±0.7e	27.2±0.7d
ABS4-1C	Null	59.9±0.9d	76.9±2.4f	2.8±2.1bc	nd	3.7±2.1de	nd	nd	nd	nd	17.8±2.4e	7.24±4.55a	7.33±4.70cd	nd	140.3±5.0ef	25.4±3.2e	23.3±1.2d
ABS4-2A	Null	61.6±5.1d	64.2±5.2g	3.9±0.4abc	nd	3.9±0.4de	nd	nd	nd	nd	15.5±1.4e	5.34±0.93ab	5.43±0.77d	nd	129.8±10.6f	21.1±0.8e	20.3±1.2d
ABS4-2B	Null	65.2±3.8d	77.5±3.4f	4.0±0.8abc	nd	4.7±0.3cde	nd	nd	nd	nd	19.3±2.6e	5.76±1.37ab	5.89±1.16d	nd	147.3±6.3ef	25.5±4.1e	24.8±3.4d
ABS4-2C	Null	73.7±4.7d	84.0±1.4ef	2.4±1.8bc	nd	2.4±1.8e	nd	nd	nd	nd	23.7±2.8e	6.91±4.94a	7.10±4.77cd	nd	159.2±8.6ef	31.2±7.2e	28.2±4.3d
ABS4-2D	Null	58.2±1.2d	80.5±1.5f	5.3±1.5abc	nd	5.9±0.5bcde	nd	nd	nd	nd	17.9±1.7e	4.55±1.66ab	4.66±1.48d	nd	144.6±3.0ef	23.0±2.9e	23.4±2.3d
Control	NA	64.9±5.6d	60.9±1.3g	4.8±0.5abc	nd	4.8±0.5cde	nd	nd	nd	nd	11.0±0.9e	6.04±1.03ab	6.30±1.15d	nd	130.6±6.5f	18.0±1.6e	16.9±1.0d
nd indicates analyte was not detected (signal to noise ratio of peak below 3)
Carotenoids are reported in micrograms of carotenoids per 40 g sorghum flour (200 g porridge serving equivalent)
CombACryp represents the sum of 13 cis alpha cryptoxanthin and all-trans cryptoxanthin
cisBetaCaro represents the sum of 9, 13, and 15 cis beta carotene
Xanthophylls represent the sum of xanthophyll carotenoids (lutein, zeaxanthin, and ⍺ and β-cryptoxanthin)
Carotenes represent the sum of ⍺ and β-carotene, cis-β-carotene isomers, and lycopene
Provitamin A was calculated as the sum of β-carotene plus half of the sum of ⍺ and β-cryptoxanthin, ⍺-carotene, 15-cis-β-carotene, 13-cis-β-carotene, and 9-cis-β-carotene.
All data are reported as means ± standard deviation and different letters indicate statistical significance as determined by a Tukey’s HSD (α = 0.05) posthoc test

## Sheet: S2
Event Identifier	Transgene State	Steeping	Bioaccessibility	Lutein	Zeaxanthin	X13cisAlphaCryp	AlphaCryp	CombACryp	BetaCryp	X15cisBetaCaro	X13cisBetaCaro	AlphaCaro	BetaCaro	X9cisBetaCaro	cisBetaCaro	Lycopene	Xanthophylls	Carotenes	ProvitaminA
ABS4-1A	Present	Non-steeped	Relative	32.1±7.6bc	33.0±8.2ab	29.9±2.9a	nd	34.8±1.4abcd	27.8±4.4ab	9.8±17.0b	18.5±5.5a	15.1±5.2ab	16.7±6.4bc	nd	21.5±7.2a	20.2±9.9ab	32.5±7.4bc	17.8±6.5ab	18.3±6.4bc
ABS4-1B	Present	Non-steeped	Relative	32.0±10.9bc	33.0±9.9ab	36.9±11.5a	28.9±10.1ab	32.7±10.7abcd	37.0±15.5ab	13.6±12.2b	15.5±7.2a	14.0±5.9ab	13.6±6.7c	nd	17.8±9.2a	17.3±7.6ab	32.5±10.6bc	14.6±7.2ab	15.2±7.3c
ABS4-1C	Present	Non-steeped	Relative	45.4±8.0abc	45.9±8.5ab	53.8±13.1a	31.1±4.2ab	45.2±9.0abcd	37.2±11.9ab	36.8±12.5ab	22.1±5.2a	14.2±3.5ab	23.6±6.0abc	nd	21.1±4.9a	19.8±4.6ab	45.5±8.3abc	22.4±5.5ab	23.1±5.6abc
ABS4-2A	Present	Non-steeped	Relative	26.2±1.2c	28.4±1.5b	30.3±3.4a	21.5±0.4ab	24.4±0.7d	21.5±0.8ab	23.4±1.3b	14.6±1.0a	12.3±0.9ab	15.0±1.0bc	nd	15.9±2.0a	16.6±1.5ab	26.8±1.2c	15.0±1.1ab	15.3±1.1c
ABS4-2B	Present	Non-steeped	Relative	35.2±12.8bc	36.4±11.1ab	35.5±5.0a	29.4±7.1ab	31.7±6.1abcd	30.8±6.1ab	26.8±14.1b	20.4±6.5a	16.5±6.0ab	20.6±7.3abc	nd	20.9±6.6a	23.7±9.0a	35.2±11.3abc	20.5±7.0ab	20.7±7.0abc
ABS4-2C	Present	Non-steeped	Relative	38.8±9.3abc	40.9±7.3ab	46.7±8.2a	34.4±4.6ab	39.3±5.9abcd	37.5±4.5ab	nd	22.0±5.2a	19.5±6.8a	22.6±6.0abc	nd	21.6±8.0a	21.2±5.0ab	39.6±8.3abc	22.1±6.5ab	22.7±6.5abc
ABS4-2D	Present	Non-steeped	Relative	31.1±1.8bc	33.6±2.6ab	32.5±18.6a	24.3±34.3ab	28.7±6.2cd	23.9±4.6ab	4.9±6.9b	15.9±2.4a	13.2±2.3ab	19.6±1.7abc	nd	10.2±0.9a	19.0±2.3ab	31.8±2.5bc	16.9±1.3ab	17.2±1.1bc
ABS4-1A	Null	Non-steeped	Relative	27.3±0.6c	28.0±1.3b	32.1±0.7a	nd	32.1±0.7abcd	nd	nd	nd	nd	13.3±3.8c	15.0±8.7ab	11.8±5.5a	nd	27.9±0.6c	12.6±4.5b	16.4±4.0bc
ABS4-1B	Null	Non-steeped	Relative	31.0±9.7bc	31.7±10.6ab	33.2±7.8a	nd	33.2±7.8abcd	nd	nd	nd	nd	17.4±3.9bc	23.8±8.6ab	17.0±3.3a	nd	31.4±10.0bc	17.2±3.6ab	19.9±4.5abc
ABS4-1C	Null	Non-steeped	Relative	36.9±5.4abc	39.4±3.8ab	37.5±6.8a	nd	37.5±6.8abcd	nd	nd	nd	nd	22.9±4.4abc	28.9±14.4a	23.1±9.2a	nd	38.1±4.7abc	22.9±6.1ab	25.7±5.8abc
ABS4-2A	Null	Non-steeped	Relative	44.9±7.7abc	41.7±2.8ab	41.9±5.4a	nd	41.9±5.4abcd	nd	nd	nd	nd	21.4±3.7abc	17.7±7.1ab	15.9±8.8a	nd	43.2±5.2abc	19.3±5.9ab	23.0±6.3abc
ABS4-2B	Null	Non-steeped	Relative	47.8±8.9abc	43.0±6.7ab	45.2±7.3a	nd	45.2±7.3abcd	nd	nd	nd	nd	24.6±5.7abc	21.6±4.2ab	21.4±3.0a	nd	45.3±7.6abc	23.4±4.9ab	26.7±5.1abc
ABS4-2C	Null	Non-steeped	Relative	55.3±8.4ab	49.9±7.8ab	52.9±5.7a	nd	52.9±5.7ab	nd	nd	nd	nd	30.6±9.9ab	28.9±13.6a	26.0±13.1a	nd	52.5±7.9ab	28.8±11.1ab	33.3±10.0ab
ABS4-2D	Null	Non-steeped	Relative	59.5±7.6a	53.8±6.8a	54.2±6.3a	nd	54.2±6.3a	nd	nd	nd	nd	34.2±4.3a	28.2±13.8ab	27.2±11.5a	nd	56.3±7.1a	31.8±7.0a	36.7±6.4a
Control	NA	Non-steeped	Relative	48.6±10.6abc	45.5±9.1ab	49.2±11.4a	nd	49.2±11.4abc	nd	nd	nd	nd	21.5±2.3abc	22.3±3.5ab	18.0±4.9a	nd	47.3±9.9abc	20.3±3.3ab	26.5±4.6abc
ABS4-1A	Present	Steeped	Relative	34.5±6.9bc	38.8±11.7ab	59.0±41.2a	nd	37.5±7.7abcd	34.3±13.2ab	6.4±11.1b	17.2±7.1a	16.5±7.4ab	16.8±4.7bc	25.5±9.4ab	19.6±7.7a	21.2±7.0ab	36.3±8.6abc	17.6±5.4ab	18.3±5.5bc
ABS4-1B	Present	Steeped	Relative	30.6±3.4c	30.0±5.6ab	34.5±14.4a	19.6±17.0ab	34.3±3.2abcd	32.1±2.1ab	nd	13.5±1.9a	9.8±1.2ab	14.6±2.3bc	18.0±3.3ab	14.5±0.9a	13.7±4.6abc	30.6±4.2bc	14.3±1.6b	15.0±1.6c
ABS4-1C	Present	Steeped	Relative	37.2±11.9abc	35.5±13.7ab	44.8±10.8a	43.5±18.0a	43.8±12.2abcd	47.8±24.9a	nd	16.8±7.2a	13.1±10.2ab	19.4±8.3abc	22.9±15.6ab	18.8±9.7a	6.8±7.9bc	37.0±12.7abc	18.3±9.0ab	19.7±9.0abc
ABS4-2A	Present	Steeped	Relative	25.8±1.0c	27.4±2.5b	37.6±9.5a	25.7±3.7ab	30.1±5.5cd	26.1±6.3ab	nd	11.7±2.7a	10.7±2.2ab	14.1±3.0c	15.9±1.9ab	13.2±2.3a	14.4±3.3abc	26.7±1.7c	13.6±2.6b	14.1±2.6c
ABS4-2B	Present	Steeped	Relative	49.3±5.9abc	49.5±5.8ab	58.9±5.3a	40.2±1.7a	47.2±2.9abc	34.1±6.8ab	67.3±42.5a	22.9±1.5a	17.7±1.5a	25.1±3.0abc	16.6±1.5ab	20.6±1.3a	24.9±4.2a	48.9±5.3abc	23.3±2.3ab	24.0±2.1abc
ABS4-2C	Present	Steeped	Relative	37.2±3.7abc	38.0±2.7ab	43.7±7.2a	30.6±6.9ab	36.5±7.0abcd	30.9±11.6ab	nd	15.1±1.4a	13.1±1.4ab	19.8±2.6abc	19.7±1.2ab	16.7±1.3a	16.8±2.7ab	37.4±3.7abc	18.3±2.1ab	19.0±2.3bc
ABS4-2D	Present	Steeped	Relative	28.0±7.9c	27.5±7.2b	50.5±22.9a	5.8±5.9b	31.0±10.6bcd	11.7±13.7b	nd	13.4±3.4a	10.4±3.6ab	15.7±3.9bc	nd	8.8±2.4a	12.4±3.7abc	27.8±7.9c	13.3±3.5b	13.8±3.6c
ABS4-1A	Present	Non-steeped	Absolute	61.4±13.5abc	64.0±15.6ab	2.6±0.2a	nd	6.3±0.3a	2.7±0.1a	0.1±0.2a	5.7±1.0a	2.6±0.6a	97.1±38.0c	nd	7.5±0.7ab	2.1±1.0defgh	134.4±28.3abcde	114.8±41.2c	114.0±39.4b
ABS4-1B	Present	Non-steeped	Absolute	64.8±24.5abc	50.7±16.4abc	1.3±0.1a	4.5±1.3a	6.3±1.5a	4.1±1.1a	1.1±1.0a	4.6±2.6a	2.3±1.0a	84.0±43.7cd	nd	6.8±4.1abc	1.3±0.6fgh	125.6±43.2abcde	99.3±51.7cd	100.5±50.9b
ABS4-1C	Present	Non-steeped	Absolute	87.6±13.4ab	74.1±10.4a	4.8±4.3a	1.0±1.0a	4.9±3.6a	3.5±1.1a	2.4±1.1a	6.8±1.8a	2.2±0.5a	146.8±32.5abc	nd	7.9±2.1a	1.7±0.4efgh	170.3±26.2ab	153.0±32.7abc	152.0±31.7ab
ABS4-2A	Present	Non-steeped	Absolute	47.9±6.1bcd	35.5±4.1bc	0.5±0.0a	4.3±0.1a	5.1±0.1a	2.3±0.4a	2.3±0.2a	2.8±0.2a	4.5±0.6a	89.6±11.0cd	nd	4.7±1.0abc	4.2±0.5cd	90.8±10.7bcdef	103.9±15.0cd	99.1±14.1bc
ABS4-2B	Present	Non-steeped	Absolute	72.2±26.2abc	59.6±20.3abc	0.7±0.3a	3.8±4.7a	4.4±5.5a	3.3±4.0a	1.8±2.0a	6.5±0.3a	4.1±5.4a	200.0±66.9ab	nd	8.4±2.4a	7.8±2.5a	136.5±33.8abcde	219.3±54.0ab	210.5±53.1a
ABS4-2C	Present	Non-steeped	Absolute	54.8±12.9abcd	50.9±8.5abc	1.5±0.4a	4.3±0.9a	6.2±1.4a	3.1±0.6a	nd	3.6±1.0a	4.2±1.6a	112.5±30.4bc	nd	3.5±1.5abc	4.7±1.1bc	114.8±23.9abcdef	123.4±37.1bc	120.2±35.5ab
ABS4-2D	Present	Non-steeped	Absolute	41.6±6.2cd	45.3±4.5abc	1.1±0.9a	3.0±4.2a	4.1±1.2a	2.5±0.7a	0.3±0.4a	3.4±0.6a	3.2±0.5a	116.4±7.4bc	nd	2.5±0.7abc	5.0±0.5bc	93.2±13.0bcdef	113.3±7.5c	108.7±5.1b
ABS4-1A	Null	Non-steeped	Absolute	19.8±1.0d	26.1±2.2c	1.6±1.0a	nd	1.6±1.0a	nd	nd	nd	nd	2.8±0.7d	0.9±0.4a	0.8±0.3c	nd	47.5±3.3f	3.5±1.2e	4.4±1.2c
ABS4-1B	Null	Non-steeped	Absolute	22.8±7.1d	24.3±8.6c	1.6±0.3a	nd	1.6±0.3a	nd	nd	nd	nd	3.7±0.8d	1.5±0.5a	1.1±0.1c	nd	48.7±15.9f	4.8±0.9e	5.4±1.1c
ABS4-1C	Null	Non-steeped	Absolute	22.1±3.4d	30.4±3.9bc	1.1±0.9a	nd	1.5±0.9a	nd	nd	nd	nd	4.1±1.0d	1.7±0.2a	1.4±0.4abc	nd	53.6±8.4ef	5.7±0.8de	5.9±1.1c
ABS4-2A	Null	Non-steeped	Absolute	28.1±2.0cd	27.3±1.0c	1.6±0.0a	nd	1.6±0.0a	nd	nd	nd	nd	3.3±0.2d	0.9±0.5a	0.9±0.6c	nd	56.9±1.1ef	4.1±1.1e	4.6±0.9c
ABS4-2B	Null	Non-steeped	Absolute	30.9±3.8cd	33.1±3.9bc	1.8±0.1a	nd	2.1±0.5a	nd	nd	nd	nd	4.7±1.2d	1.2±0.4a	1.2±0.2bc	nd	66.4±8.2def	5.9±1.3de	6.6±1.4c
ABS4-2C	Null	Non-steeped	Absolute	41.0±8.8cd	42.0±7.1abc	1.3±1.1a	nd	1.3±1.1a	nd	nd	nd	nd	7.2±2.2d	1.9±1.2a	1.8±1.4abc	nd	83.9±17.1cdef	8.9±3.6de	9.4±3.1c
ABS4-2D	Null	Non-steeped	Absolute	34.6±4.3cd	43.3±5.0abc	2.9±0.9a	nd	3.2±0.5a	nd	nd	nd	nd	6.2±1.2d	1.2±0.6a	1.2±0.6bc	nd	81.4±9.7cdef	7.3±2.0de	8.6±2.0c
Control	NA	Non-steeped	Absolute	31.3±5.8cd	27.8±5.9c	2.4±0.5a	nd	2.4±0.5a	nd	nd	nd	nd	2.4±0.5d	1.3±0.2a	1.2±0.4c	nd	61.5±12.1ef	3.7±0.9e	4.5±1.0c
ABS4-1A	Present	Steeped	Absolute	66.5±14.3abc	75.5±23.8a	4.9±2.6a	nd	6.9±2.1a	3.3±1.0a	0.4±0.6a	5.6±3.1abc	3.0±1.7a	97.9±27.0c	0.2±0.1bc	7.6±4.7a	2.1±0.6defgh	151.1±39.1abc	113.9±36.6c	113.8±34.9b
ABS4-1B	Present	Steeped	Absolute	61.5±4.9abc	45.8±7.8abc	1.3±0.7a	3.2±2.8ab	6.7±1.1a	3.7±0.6a	nd	3.9±0.3abcd	1.6±0.2a	89.7±13.5c	0.2±0.0c	5.4±0.1abc	1.1±0.4gh	117.7±14.6abcdef	96.4±9.9cd	98.5±9.7bc
ABS4-1C	Present	Steeped	Absolute	72.1±23.5abc	57.9±24.3abc	3.9±2.7a	1.7±2.2ab	5.0±4.0a	4.6±2.8a	nd	5.1±2.0abc	2.1±1.7a	121.6±54.7bc	0.2±0.1bc	6.9±3.3abc	0.6±0.7h	140.0±52.7abcd	126.4±64.6bc	131.1±63.1ab
ABS4-2A	Present	Steeped	Absolute	47.3±4.0cd	34.7±4.1bc	0.8±0.5a	4.9±0.4ab	6.2±1.0a	2.0±0.7a	nd	2.2±0.4cd	4.0±0.8a	85.4±18.2cd	0.1±0.0c	3.5±0.6abc	3.5±0.7cdef	90.4±8.3cdef	94.3±18.0cd	92.0±17.2bc
ABS4-2B	Present	Steeped	Absolute	93.2±10.3a	74.2±8.8a	1.4±0.5a	6.5±5.2a	8.5±6.7a	3.3±2.8a	3.9±5.7a	6.1±1.7ab	5.2±4.8a	213.7±27.8a	0.1±0.0c	6.7±3.6abc	7.1±1.3ab	178.8±18.8a	219.4±32.1a	214.9±27.2a
ABS4-2C	Present	Steeped	Absolute	53.6±5.1bcd	48.6±4.2abc	1.3±0.2a	3.9±0.7ab	5.8±0.8a	2.5±0.8a	nd	2.5±0.2bcd	2.9±0.3a	99.9±14.0c	0.2±0.0bc	2.8±0.2abc	3.7±0.6cde	110.5±10.7abcdef	103.9±12.5c	102.2±12.5b
ABS4-2D	Present	Steeped	Absolute	37.6±12.5cd	37.0±10.2bc	1.6±0.5a	0.5±0.5b	4.3±1.7a	1.2±1.5a	nd	2.8±0.8bcd	2.5±0.8a	94.0±21.6c	nd	2.1±1.0abc	3.2±1.0cdefg	81.4±25.7cdef	89.0±22.2cde	87.3±21.2bc
nd indicates analyte was not detected (signal to noise ratio of peak below 3)
Relative bioaccessibility reported as a percent of micellerized carotenoids in the aqueous fraction relative to the amount in the digesta fraction
Absolute bioaccessibility reported as µg carotenoid available for absorption per 40 g of flour (200 g porridge serving)
Xanthophylls represent the sum of xanthophyll carotenoids (lutein, zeaxanthin, and ⍺ and β-cryptoxanthin)
Carotenes represent the sum of ⍺ and β-carotene, cis-β-carotene isomers, and lycopene
Provitamin A was calculated as the sum of β-carotene plus half of the sum of ⍺ and β-cryptoxanthin, ⍺-carotene, 15-cis-β-carotene, 13-cis-β-carotene, and 9-cis-β-carotene.
All data are reported as means ± standard deviation and different letters indicate statistical significance as determined by a Tukey’s HSD (α = 0.05) posthoc test
Statistical comparisons were made within either absolute or relative bioaccessibility

## Sheet: S3
Event Identifier	Transgene State	Zinc	Iron	Calcium	Magnesium	Phosphorous	Potassium	Sulfur	Manganese	Copper	Boron	Aluminum
ABS4-1A	Present	1.3±0.0abc	1.4±0.2b	14.7±2.3ab	58.7±6.1abc	147.3±17.5ab	188.0±20.0a	45.3±2.3ab	0.9±0.0abc	0.1±0.0bc	0.1±0.0b	0.3±0.0a
ABS4-1B	Present	1.6±0.3abc	1.5±0.1b	16.0±0.0ab	68.0±13.9ab	156.9±35.3ab	178.7±35.9ab	46.7±4.6ab	1.1±0.3a	0.1±0.3ab	0.2±0.0ab	0.4±0.1a
ABS4-1C	Present	1.5±0.2abc	1.8±0.6ab	17.3±2.3ab	65.3±6.1ab	143.6±18.2ab	178.7±20.1ab	52.0±6.9a	1.0±0.2abc	0.1±0.2ab	0.2±0.0ab	0.6±0.3a
ABS4-2A	Present	2.0±0.2a	2.1±0.7ab	17.3±6.1ab	73.3±4.6a	162.3±10.6a	168.0±10.6abc	50.7±2.3a	1.0±0.2abc	0.2±0.2a	0.2±0.0a	0.5±0.4a
ABS4-2B	Present	1.6±0.4ab	1.3±0.1b	16.0±0.0ab	68.0±0.0ab	140.4±4.7ab	145.3±2.3bcde	46.7±2.3ab	1.0±0.4abc	0.1±0.4bc	0.2±0.0ab	0.3±0.1a
ABS4-2C	Present	1.6±0.2abc	1.7±0.3ab	16.0±0.0ab	66.7±12.9ab	144.1±29.8ab	141.3±26.6cde	48.0±8.0ab	0.9±0.2abc	0.1±0.2ab	0.2±0.1ab	0.2±0.1a
ABS4-2D	Present	1.5±0.1abc	1.6±0.2ab	17.3±2.3ab	70.7±4.6ab	160.9±12.4a	164.0±13.9abc	49.3±6.1a	1.1±0.1a	0.1±0.1b	0.2±0.1ab	0.4±0.1a
ABS4-1A	Null	1.4±0.1abc	1.3±0.1b	13.3±2.3b	61.3±2.3abc	132.8±4.1ab	150.7±4.6bcd	45.3±2.3ab	0.9±0.1bc	0.1±0.1bc	0.1±0.1ab	0.4±0.0a
ABS4-1B	Null	1.3±0.2abc	1.5±0.2b	21.3±6.1ab	62.7±11.5ab	140.8±24.6ab	148.0±21.2bcde	42.7±6.1ab	0.9±0.2abc	0.1±0.2bc	0.2±0.1ab	0.7±0.6a
ABS4-1C	Null	1.3±0.2abc	1.4±0.5b	13.3±2.3b	57.3±6.1abc	120.4±13.0bc	144.0±17.4bcde	44.0±6.9ab	0.8±0.2cd	0.1±0.2bc	0.2±0.1ab	0.5±0.3a
ABS4-2A	Null	1.5±0.2abc	2.5±0.7a	22.7±2.3a	68.0±4.0ab	140.1±9.0ab	157.3±6.1abcd	42.7±2.3ab	0.9±0.2abc	0.1±0.2bc	0.2±0.0ab	0.7±0.1a
ABS4-2B	Null	1.4±0.1abc	1.5±0.1b	16.0±0.0ab	65.3±2.3ab	137.1±9.9ab	138.7±9.2cde	45.3±4.6ab	0.9±0.1abc	0.1±0.1bc	0.2±0.1ab	0.3±0.0a
ABS4-2C	Null	1.2±0.1bc	1.4±0.1b	13.3±2.3b	56.0±8.0bc	119.1±15.9bc	113.3±16.7e	41.3±2.3ab	0.8±0.1cd	0.1±0.1bc	0.1±0.1b	0.3±0.0a
ABS4-2D	Null	1.8±0.2ab	2.0±0.2ab	17.3±2.3ab	64.0±8.0ab	139.5±17.1ab	138.7±18.0cde	48.0±4.0ab	1.1±0.2ab	0.1±0.2ab	0.2±0.0ab	0.3±0.1a
Control	NA	1.0±0.3c	1.3±0.2b	13.3±2.3b	45.3±2.3c	90.8±5.1c	126.7±4.6de	37.3±4.6b	0.6±0.3d	0.0±0.3c	0.2±0.1ab	0.4±0.1a
Mineral concentrations reported as mg per 40 g of flour (200 g porridge serving)
All data are reported as means ± standard deviation and different letters indicate statistical significance as determined by a Tukey’s HSD (α = 0.05) posthoc test

## Sheet: S4
Event Identifier	Transgene State	Steeping	IP1	IP2	IP2_1	TotalIP2	IP3	IP3_1	IP3_2	TotalIP3	IP4	IP5	IP6	TotalPhytates
ABS4-1A	Present	Non-steeped	0.5±0.2d	0.9±0.3e	nd	0.9±0.3ef	0.5±0.1e	1.2±0.4cde	0.2±0.1bc	1.9±0.6bcd	16.7±1.5c	39.5±3.6abc	307.1±37.9abcdef	366.5±42.9abcd
ABS4-1B	Present	Non-steeped	0.3±0.1d	0.3±0.0e	nd	0.4±0.0f	0.2±0.0e	0.4±0.1de	0.1±0.0c	0.7±0.1d	13.3±0.4c	35.6±0.9abc	324.4±10.7abcde	374.7±10.8abcd
ABS4-1C	Present	Non-steeped	0.3±0.2d	0.7±0.5e	nd	0.7±0.5f	0.4±0.3e	0.6±0.4cde	0.1±0.1bc	1.2±0.7cd	16.7±3.0c	40.9±5.8ab	364.9±44.0ab	424.5±51.1abc
ABS4-2A	Present	Non-steeped	0.3±0.0d	0.6±0.3e	nd	0.6±0.3f	0.4±0.2e	0.7±0.5cde	0.1±0.1bc	1.3±0.7cd	17.9±0.8c	42.9±1.3a	388.5±32.1a	451.7±33.0a
ABS4-2B	Present	Non-steeped	0.3±0.1d	0.6±0.3e	nd	0.6±0.3f	0.2±0.1e	0.4±0.3de	0.1±0.0c	0.7±0.4d	14.9±1.4c	36.2±4.5abc	310.4±36.0abcde	363.1±41.1abcd
ABS4-2C	Present	Non-steeped	0.4±0.1d	0.7±0.3e	nd	0.7±0.3ef	0.4±0.1e	0.8±0.6cde	0.2±0.1bc	1.4±0.7cd	15.0±3.0c	35.6±7.1abc	304.4±43.1abcdefg	357.5±53.5abcd
ABS4-2D	Present	Non-steeped	0.3±0.1d	0.6±0.2e	0.1±0.1bcd	0.7±0.2ef	0.7±0.5de	0.5±0.3cde	0.1±0.0c	1.3±0.4cd	16.9±2.0c	40.7±3.7ab	358.8±40.6abc	418.8±46.2abc
ABS4-1A	Present	Steeped	24.9±0.8a	5.7±0.5bcd	0.2±0.0bc	6.0±0.5bcd	1.0±0.4cde	4.0±2.4abcde	1.1±0.6abc	6.1±3.4abcd	13.9±9.5c	12.4±3.4i	66.5±20.9j	129.9±13.3g
ABS4-1B	Present	Steeped	23.2±1.1ab	7.4±2.2ab	0.2±0.1bc	7.6±2.3b	1.4±0.9bcde	4.2±2.6abcde	1.0±0.6abc	6.6±4.2abcd	13.7±5.1c	14.7±2.1hi	113.5±12.1ij	179.3±9.5fg
ABS4-1C	Present	Steeped	24.8±1.2a	10.5±3.2a	0.8±0.3a	11.3±3.4a	3.0±1.8abc	8.6±4.4a	2.2±1.1a	13.8±7.2a	22.2±8.9c	16.5±2.7fghi	79.2±26.3j	167.9±5.8fg
ABS4-2A	Present	Steeped	23.9±1.0a	6.6±1.3bc	0.1±0.1bcd	6.7±1.3bc	0.8±0.7de	2.3±1.6bcde	0.6±0.4bc	3.7±2.6bcd	16.1±11.1c	16.2±6.6ghi	100.5±16.3j	167.2±31.0fg
ABS4-2B	Present	Steeped	19.9±3.3bc	5.1±1.6bcd	0.1±0.1bcd	5.3±1.7bcd	1.4±1.1bcde	4.3±3.5abcde	0.9±0.7bc	6.6±5.3abcd	24.6±17.5c	20.3±8.6defghi	67.3±5.4j	144.0±33.6fg
ABS4-2C	Present	Steeped	18.5±2.8c	5.8±2.7bcd	0.1±0.1bcd	5.9±2.8bcd	1.1±1.5bcde	3.7±3.7abcde	0.9±1.0bc	5.7±6.2abcd	23.1±18.6c	16.9±8.6efghi	75.9±10.6j	146.0±29.7fg
ABS4-2D	Present	Steeped	23.9±4.0a	6.4±2.2bc	0.3±0.1b	6.7±2.3bc	1.4±1.4bcde	5.6±4.3abcde	1.4±0.9ab	8.4±6.7abcd	16.9±14.9c	11.3±4.9i	36.7±6.6j	103.9±26.2g
ABS4-1A	Null	Non-steeped	0.3±0.0d	0.1±0.0e	nd	0.1±0.0f	0.1±0.0e	0.2±0.0e	0.1±0.0c	0.3±0.0d	12.2±0.9c	29.7±0.5abcdefg	314.1±13.0abcde	356.7±14.3abcd
ABS4-1B	Null	Non-steeped	0.2±0.1d	0.1±0.0e	nd	0.2±0.0f	0.1±0.1e	0.1±0.0e	0.1±0.0c	0.3±0.0d	11.1±1.7c	28.7±3.4bcdefg	293.3±42.5bcdefg	333.9±47.4bcde
ABS4-1C	Null	Non-steeped	0.2±0.1d	0.1±0.0e	nd	0.1±0.0f	0.1±0.0e	0.1±0.1e	0.1±0.0c	0.3±0.0d	12.0±1.1c	30.0±1.7abcdef	317.6±22.0abcde	360.3±24.8abcd
ABS4-2A	Null	Non-steeped	0.2±0.0d	0.1±0.0e	nd	0.1±0.0f	0.1±0.0e	0.1±0.0e	0.1±0.0c	0.3±0.0d	12.9±1.1c	30.3±2.4abcde	337.6±25.3abcd	381.2±28.8abcd
ABS4-2B	Null	Non-steeped	0.3±0.0d	0.1±0.0e	nd	0.1±0.0f	0.1±0.0e	0.1±0.0e	0.1±0.0c	0.3±0.0d	10.5±1.1c	26.6±1.0cdefgh	269.3±17.8cdefgh	307.1±19.8de
ABS4-2C	Null	Non-steeped	0.2±0.1d	0.1±0.0e	nd	0.2±0.0f	0.1±0.0e	0.1±0.0e	0.1±0.0c	0.3±0.0d	10.8±1.3c	27.8±3.1bcdefgh	281.2±35.6bcdefgh	320.5±39.7cde
ABS4-2D	Null	Non-steeped	0.3±0.0d	0.3±0.2e	nd	0.3±0.2f	0.2±0.1e	0.2±0.0e	0.1±0.0c	0.4±0.1d	11.3±1.8c	27.9±2.7bcdefgh	284.7±29.5bcdefgh	324.8±34.1bcde
ABS4-1A	Null	Steeped	0.9±0.0d	4.4±0.3bcd	nd	4.3±0.3bcde	3.2±0.7ab	6.0±0.1abc	0.4±0.0bc	9.6±0.9abc	100.1±8.5a	43.1±4.9a	274.8±39.4cdefgh	432.8±53.6ab
ABS4-1B	Null	Steeped	0.9±0.1d	2.5±0.1de	nd	2.4±0.1def	1.8±1.1bcde	3.8±0.9abcde	0.3±0.0bc	5.9±0.2abcd	77.7±1.7ab	40.7±1.6ab	255.1±16.6defgh	382.7±17.5abcd
ABS4-1C	Null	Steeped	1.1±0.1d	4.7±0.5bcd	nd	4.6±0.5bcd	3.1±0.3abc	5.8±1.3abcd	0.4±0.1bc	9.3±1.1abc	86.6±12.7a	36.0±3.5abc	216.0±28.1gh	353.6±40.3abcd
ABS4-2A	Null	Steeped	0.9±0.0d	3.4±0.3cde	nd	3.4±0.3cdef	2.8±0.5abcd	5.1±1.3abcde	0.4±0.1bc	8.2±0.8abcd	90.5±9.4a	41.3±2.6ab	246.4±8.2efgh	390.7±4.9abcd
ABS4-2B	Null	Steeped	1.0±0.1d	4.8±0.1bcd	nd	4.7±0.1bcd	2.8±0.5abcd	6.9±0.8ab	0.4±0.0bc	10.1±0.9ab	92.7±3.8a	38.5±1.8abc	239.5±23.6efgh	386.5±28.2abcd
ABS4-2C	Null	Steeped	1.1±0.1d	5.4±1.1bcd	nd	5.3±1.1bcd	4.1±0.3a	5.4±1.6abcde	0.4±0.2bc	10.0±2.0ab	88.8±21.2a	36.2±6.3abc	237.2±31.4efgh	378.7±57.3abcd
ABS4-2D	Null	Steeped	0.9±0.1d	2.9±0.4de	nd	2.8±0.4def	2.0±0.3abcde	4.2±0.2abcde	0.4±0.1bc	6.6±0.7abcd	89.0±7.6a	43.2±3.1a	270.9±28.3cdefgh	413.5±33.5abcd
Control	NA	Non-steeped	0.2±0.0d	0.3±0.1e	0.1±0.1bcd	0.4±0.1f	0.3±0.1e	0.3±0.1de	0.1±0.0c	0.7±0.2d	12.2±2.6c	27.1±4.1cdefgh	201.1±34.6hi	241.6±41.3ef
Control	NA	Steeped	0.7±0.0d	3.2±0.5cde	nd	3.1±0.5cdef	1.5±0.5bcde	3.6±0.5abcde	0.3±0.1bc	5.4±0.8abcd	56.9±8.8b	32.9±2.6abcd	220.0±20.8fgh	319.2±33.0cde
nd indicates analyte was not detected (signal to noise ratio of peak below 3)
Inositol phosphate concentrations reported as mg per 40 g of flour (200 g porridge serving)
Inositol phosphate species with an "_" followed by a number indicate isomers of the parent compound
"Total" columns represent the sum of all isomers of a given inositol phosphate species
All data are reported as means ± standard deviation and different letters indicate statistical significance as determined by a Tukey’s HSD (α = 0.05) posthoc test

## Sheet: S5
Event Identifier	Transgene State	Steeping	IP6ToZn	IP6ToFe
ABS4-1A	Present	Non-steeped	23.2±3.1a	19.6±4.2a
ABS4-1B	Present	Non-steeped	20.9±3.6a	18.2±1.7ab
ABS4-1C	Present	Non-steeped	24.7±5.3a	18.6±7.3ab
ABS4-2A	Present	Non-steeped	19.9±3.1a	16.8±5.4ab
ABS4-2B	Present	Non-steeped	20.1±7.0a	19.8±1.9a
ABS4-2C	Present	Non-steeped	19.3±4.1a	15.5±4.1abc
ABS4-2D	Present	Non-steeped	23.4±3.5a	19.0±2.8a
ABS4-1A	Present	Steeped	5.0±1.6cde	4.3±2.0de
ABS4-1B	Present	Steeped	7.2±0.4bcde	6.3±0.3cde
ABS4-1C	Present	Steeped	5.2±1.2cde	3.7±0.7de
ABS4-2A	Present	Steeped	5.1±1.1cde	4.2±0.9de
ABS4-2B	Present	Steeped	4.4±1.4de	4.3±0.3de
ABS4-2C	Present	Steeped	4.8±1.0cde	3.8±0.6de
ABS4-2D	Present	Steeped	2.4±0.6e	1.9±0.3e
ABS4-1A	Null	Non-steeped	22.6±1.8a	19.9±0.5a
ABS4-1B	Null	Non-steeped	22.3±6.5a	17.0±4.7ab
ABS4-1C	Null	Non-steeped	23.6±3.0a	20.7±6.1a
ABS4-2A	Null	Non-steeped	22.0±1.9a	11.7±3.0abcde
ABS4-2B	Null	Non-steeped	19.2±2.5a	15.4±0.8abc
ABS4-2C	Null	Non-steeped	23.1±3.7a	17.6±2.7ab
ABS4-2D	Null	Non-steeped	15.8±1.0abcd	12.3±2.3abcd
ABS4-1A	Null	Steeped	20.0±4.8a	17.5±2.7ab
ABS4-1B	Null	Steeped	19.0±2.2a	14.5±1.6abc
ABS4-1C	Null	Steeped	16.3±4.3abc	14.6±6.3abc
ABS4-2A	Null	Steeped	16.1±2.2abc	8.6±2.6bcde
ABS4-2B	Null	Steeped	17.1±2.8ab	13.7±1.1abcd
ABS4-2C	Null	Steeped	19.3±1.0a	14.7±0.8abc
ABS4-2D	Null	Steeped	15.0±0.7abcd	11.7±2.2abcde
Control	NA	Non-steeped	21.5±4.1a	13.7±4.0abcd
Control	NA	Steeped	24.5±8.9a	14.7±1.2abc
Ratios reported as moles of phytate (IP6) in 40 g of flour to moles of mineral per 40 g flour
All data are reported as means ± standard deviation and different letters indicate statistical significance as determined by a Tukey’s HSD (α = 0.05) posthoc test

## Sheet: S6
MRM Parameters
Target compounds	Parent (m/z)	fragments	cone voltage (V)	collision energy (eV)	dwell time (sec)	Predicted retention time (min)	Ionization mode
IP1	259	79*	30	23	0.052	0.54	ES -
	259	179	30	20	0.052
IP2	339.01	241.01*	30	18	0.052	1.215	ES -
	339.01	259.01	30	20	0.052
IP3	419	321.01*	30	23	0.038	1.8	ES -
	419	339.01	30	20	0.038
IP4	499	321.01	30	31	0.038	2.255	ES -
	499	401.01*	30	23	0.038
IP5	579	401.01	30	37	0.038	2.55	ES -
	579	481.01*	30	30	0.038
IP6	659	481.01	30	37	0.038	2.765	ES -
	659	561.01*	30	30	0.038
* Fragments used for quantification
