# Supplementary material for: Trait stacking simultaneously enhances provitamin A carotenoid and mineral bioaccessibility in biofortified Sorghum bicolor
Source: Royal Society of Chemistry journal article supplement (doi:10.1039/d2fo03606a), 2023-01-01
Supplement: d2fo03606a2.xlsx [file d2fo03606a2.xlsx]

## Sheet: TableOfContents
Sheet	Description
1	Raw data of carotenoid content of uncooked, non-steeped sorghum flour
2	Raw data of relative bioaccessibility of carotenoids from steeped or non-steeped transgenic, null segrent, and control sorghum porridges
3	Raw data of absolute bioaccessibility of carotenoids from steeped or non-steeped transgenic, null segrent, and control sorghum porridges
4	Raw data of mineral content from uncooked, non-steeped transgenic, null segrent, and control sorghum flours
5	Raw data of inositol phosphate profiles from steeped or non-steeped transgenic, null segrent, and control sorghum flours
6	Raw data of phytate to iron and zinc ratios for steeped and non-steeped transgenic, null segrent, and control sorghum porridges

## Sheet: 1
Event_Name	Transgenic	Rep	Lutein	Zeaxanthin	13cisAlphaCryp	AlphaCryp	CombACryp	BetaCryp	15cisBetaCaro	13cisBetaCaro	AlphaCaro	BetaCaro	9cisBetaCaro	cisBetaCaro	Lycopene	Xanthophylls	Carotenes	ProvitaminA
Control	Null	1	68.123	59.7022	5.07331	1.34846	5.07331	1.445	0.891099	0.891099	0.504266	10.4902	5.26221	5.26221	1.95976	132.898	16.2567	15.9101
Control	Null	2	68.1191	62.268	5.20338	1.34846	5.20338	1.445	0.891099	0.891099	0.279912	10.5457	7.20708	7.52944	1.95976	135.59	18.3551	17.0521
Control	Null	3	58.3583	60.5995	4.26629	1.34846	4.26629	1.445	0.891099	0.891099	1.09389	12.0817	5.6462	6.11454	1.95976	123.224	19.2901	17.819
ABS4-1A	Null	1	71.2922	89.8755	6.44025	1.34846	6.44025	1.445	0.891099	0.891099	0.891099	20.5653	6.49901	6.82043	1.95976	167.608	27.3858	27.1957
ABS4-1A	Null	2	70.5943	92.8186	1.34846	1.34846	1.34846	1.445	0.891099	0.891099	0.330299	21.2767	7.82931	7.82931	1.95976	163.413	29.4363	25.3565
ABS4-1A	Null	3	75.8089	97.0449	6.63713	1.34846	6.63713	1.445	0.891099	0.891099	0.914871	20.484	5.67609	6.07419	1.95976	179.491	27.4731	27.2971
ABS4-1B	Null	1	72.0441	77.1628	4.63209	1.34846	4.63209	1.445	0.891099	0.891099	0.40864	20.9008	6.12495	6.12495	1.95976	153.839	27.4344	26.4837
ABS4-1B	Null	2	76.0887	77.4101	5.13793	1.34846	5.13793	1.445	0.891099	0.891099	0.521404	21.9324	5.745	5.98733	1.95976	158.637	28.4411	27.7557
ABS4-1B	Null	3	72.7563	73.253	5.22473	1.34846	5.22473	1.445	0.891099	0.891099	0.582271	21.1234	6.63718	6.95054	1.95976	151.234	28.6563	27.5022
ABS4-1C	Null	1	58.838	75.3135	1.34846	1.34846	1.34846	1.445	0.891099	0.891099	0.891099	20.1597	5.28831	5.28831	1.95976	134.738	25.448	23.097
ABS4-1C	Null	2	60.2829	79.7304	1.87689	2.49056	4.36746	1.445	0.891099	0.891099	0.400371	17.8101	4.00257	4.00257	1.95976	144.381	22.2131	22.1953
ABS4-1C	Null	3	60.6135	75.7958	5.27842	1.34846	5.27842	1.445	0.891099	0.891099	0.454736	15.3861	12.4429	12.7016	1.95976	141.688	28.5425	24.6035
ABS4-2A	Null	1	67.5254	70.2888	4.1669	1.34846	4.1669	1.445	0.891099	0.891099	0.315503	17.1379	4.27414	4.55644	1.95976	141.981	22.0099	21.6574
ABS4-2A	Null	2	58.7458	61.558	4.02135	1.34846	4.02135	1.445	0.891099	0.891099	0.891099	14.8534	5.99132	5.99132	1.95976	124.652	20.8447	20.0234
ABS4-2A	Null	3	58.5754	60.8898	3.39032	1.34846	3.39032	1.445	0.891099	0.891099	0.354839	14.4655	5.75108	5.75108	1.95976	122.856	20.5715	19.2137
ABS4-2B	Null	1	60.8531	74.5955	3.05279	1.98325	5.03604	1.445	0.891099	0.891099	0.891099	20.3387	6.30764	6.30764	1.95976	140.485	26.6463	26.0105
ABS4-2B	Null	2	66.8636	81.2991	4.65951	1.34846	4.65951	1.445	0.891099	0.891099	0.832648	21.2483	6.77912	6.77912	1.95976	152.822	28.8601	27.384
ABS4-2B	Null	3	67.7517	76.5516	4.33695	1.34846	4.33695	1.445	0.891099	0.891099	0.891099	16.4264	4.20402	4.57114	1.95976	148.64	20.9975	20.8804
ABS4-2C	Null	1	69.8347	82.7561	1.34846	1.34846	1.34846	1.445	0.891099	0.891099	0.891099	26.8802	12.5832	12.5832	1.95976	152.591	39.4634	33.1718
ABS4-2C	Null	2	72.1609	83.8538	1.34846	1.34846	1.34846	1.445	0.891099	0.891099	0.891099	22.963	4.50857	4.7887	1.95976	156.015	27.7517	25.3574
ABS4-2C	Null	3	78.9667	85.493	4.41511	1.34846	4.41511	1.445	0.891099	0.891099	1.00903	21.3877	3.62817	3.92643	1.95976	168.875	26.3232	26.063
ABS4-2D	Null	1	59.3231	82.2598	6.13515	1.34846	6.13515	1.445	0.891099	0.891099	0.494841	16.273	5.10282	5.10282	1.95976	147.718	21.8706	22.1394
ABS4-2D	Null	2	56.8703	79.4738	3.51388	1.80734	5.32122	1.445	0.891099	0.891099	0.891099	17.8108	2.68859	3.01887	1.95976	141.665	20.8296	21.9808
ABS4-2D	Null	3	58.2848	79.7945	6.2385	1.34846	6.2385	1.445	0.891099	0.891099	0.786024	19.601	5.86961	5.86961	1.95976	144.318	26.2567	26.0481
ABS4-1A	Present	1	188.88	194.256	9.51439	7.21862	16.733	8.7621	0.891099	28.1012	16.1053	588.21	0.891099	28.1012	9.55167	408.631	641.968	623.06
ABS4-1A	Present	2	191.748	191.434	9.87494	7.58286	17.4578	8.59188	5.49433	30.8539	17.1022	577.048	0.891099	36.3482	11.5573	409.232	642.055	616.798
ABS4-1A	Present	3	195.947	196.876	7.23105	12.7768	20.0078	12.4045	9.23116	36.4048	20.0035	578.355	0.891099	45.6359	9.834	425.235	653.828	627.381
ABS4-1B	Present	1	199.71	150.3	4.20365	16.1564	20.3601	11.2682	8.19793	27.5982	15.8809	607.301	0.891099	35.7962	6.96044	381.638	665.939	648.954
ABS4-1B	Present	2	195.347	151.442	4.01168	16.5422	20.5539	13.5357	7.87916	27.5664	15.6907	606.473	0.891099	35.4456	8.33047	380.879	665.939	649.086
ABS4-1B	Present	3	208.929	156.429	2.66328	15.0077	17.671	9.74173	8.65215	32.1678	16.7057	630.385	0.891099	40.8199	7.47348	392.77	695.384	672.854
ABS4-1C	Present	1	195.337	168.141	8.50883	6.98363	15.4925	10.214	6.16969	29.447	16.2529	644.583	0.891099	35.6166	8.90624	389.185	705.359	683.371
ABS4-1C	Present	2	197.346	163.821	2.37347	1.34846	2.37347	8.99343	5.92365	31.8285	15.0292	630.006	0.891099	37.7522	9.22562	372.534	692.013	662.08
ABS4-1C	Present	3	188.004	154.507	14.0556	1.34846	14.0556	9.06777	7.34428	30.9819	15.2734	600.171	0.891099	38.3262	7.24683	365.634	661.017	638.532
ABS4-2A	Present	1	182.597	125.964	2.68974	17.5138	20.2035	3.8713	5.48802	16.8405	35.8084	600.858	0.891099	22.3285	24.0794	332.636	683.074	641.963
ABS4-2A	Present	2	175.093	122.246	1.34846	19.9989	19.9989	9.7546	9.13484	19.3464	36.0387	588.771	0.891099	28.4812	24.9146	327.093	678.205	635.907
ABS4-2A	Present	3	192.25	130.715	1.95213	19.7909	21.7431	11.5944	10.0203	19.8131	38.2537	629.493	0.891099	29.8334	25.1831	356.303	722.763	680.205
ABS4-2B	Present	1	194.736	149.604	2.89546	25.6921	28.5876	17.0053	16.4167	32.9546	49.7528	859.319	0.891099	49.3713	29.3303	389.933	987.773	931.677
ABS4-2B	Present	2	191.097	149.711	2.96372	22.2429	25.2066	11.9688	0.891099	22.24	34.8644	835.329	0.891099	22.24	27.973	377.983	920.407	882.469
ABS4-2B	Present	3	181.86	150.319	1.34846	1.34846	1.34846	1.445	0.891099	24.2204	0.891099	857.579	0.891099	24.2204	28.4917	332.178	910.292	869.69
ABS4-2C	Present	1	142.06	125.698	3.00441	11.785	14.7894	7.8304	0.891099	15.7633	21.1831	495.046	0.891099	15.7633	22.2729	290.377	554.265	524.829
ABS4-2C	Present	2	141.011	123.535	3.35161	13.2606	16.6122	8.72295	0.891099	16.7086	21.8706	499.398	0.891099	16.7086	21.937	289.881	559.914	531.355
ABS4-2C	Present	3	148.792	134.397	2.49811	13.7325	16.2306	8.03845	0.891099	17.7784	23.707	522.193	0.891099	17.7784	22.2003	307.457	585.879	555.071
ABS4-2D	Present	1	133.769	133.262	4.28533	8.87235	13.1577	10.1541	0.891099	19.6135	23.7184	609.036	0.891099	19.6135	24.5825	290.343	676.951	642.358
ABS4-2D	Present	2	124.624	132.505	3.6924	9.52491	13.2173	9.60427	6.39441	21.3413	23.7193	585.551	0.891099	27.7357	25.9253	279.951	662.931	622.689
ABS4-2D	Present	3	142.221	136.897	2.50223	12.3237	14.8259	10.8723	0.891099	20.6665	24.287	603.834	0.891099	20.6665	26.5155	304.817	675.303	639.16
LOD/3			2.73269	0.329066	1.34846	1.34846	1.34846	1.445	0.8911	0.8911	1.14236	0.8911	0.8911	0.8911	1.95976
Carotenoids are reported in micrograms of carotenoids per 40 g sorghum flour (200 g porridge serving equivalent)
CombACryp represents the sum of 13 cis alpha cryptoxanthin and all-trans cryptoxanthin
cisBetaCaro represents the sum of 9, 13, and 15 cis beta carotene
Xanthophylls represent the sum of xanthophyll carotenoids (lutein, zeaxanthin, and ⍺ and β-cryptoxanthin)
Carotenes represent the sum of ⍺ and β-carotene, cis-β-carotene isomers, and lycopene
ProvitaminA was calculated as the sum of β-carotene plus half of the sum of ⍺ and β-cryptoxanthin, ⍺-carotene, 15-cis-β-carotene, 13-cis-β-carotene, and 9-cis-β-carotene.
LOD/3 indicates a calculated imputation value for quantification purposes (µg carotenoid/40 g flour). LOD/3 values were excluded from composite variables (e.g. Xanthophylls)

## Sheet: 2
Event_Name	Treatment	Transgenic	Rep	Lutein	Zeaxanthin	13cisAlphaCryp	AlphaCryp	CombACryp	BetaCryp	15cisBetaCaro	13cisBetaCaro	AlphaCaro	BetaCaro	9cisBetaCaro	cisBetaCaro	Lycopene	Xanthophylls	Carotenes	ProvitaminA
ABS4-1A	Non-steeped	Null	1	27.7323	26.531	32.0057	NA	32.0057	NA	NA	8.54113	NA	12.4026	10.9158	10.1096	NA	27.3842	11.4137	15.59
ABS4-1A	Non-steeped	Null	2	26.6018	28.2336	31.5188	NA	31.5188	NA	NA	5.19245	NA	10.1043	9.13687	7.41875	NA	27.6489	8.71897	12.799
ABS4-1A	Non-steeped	Null	3	27.5106	29.0941	32.8829	NA	32.8829	NA	NA	10.7636	NA	17.4589	25.0045	18.0112	NA	28.5815	17.5621	20.6683
ABS4-1B	Non-steeped	Null	1	39.3722	41.3739	39.9734	NA	39.9734	NA	NA	NA	NA	20.7467	33.476	19.0366	NA	40.2759	20.2038	23.7716
ABS4-1B	Non-steeped	Null	2	33.3403	33.5289	34.8738	NA	34.8738	NA	NA	15.3761	NA	18.294	20.9199	18.7459	NA	33.499	18.3176	21.03
ABS4-1B	Non-steeped	Null	3	20.3329	20.3296	24.6557	NA	24.6557	NA	NA	7.37936	NA	13.1196	16.9029	13.2141	NA	20.5294	13.1917	15.0249
ABS4-1C	Non-steeped	Null	1	32.6501	35.7952	30.0611	NA	30.0611	NA	NA	12.4391	NA	22.0802	28.5429	21.4233	NA	33.972	21.9539	23.6461
ABS4-1C	Non-steeped	Null	2	42.9554	43.4458	43.3513	NA	43.3513	NA	NA	21.7769	NA	27.6578	43.5656	33.0423	NA	43.2137	29.4571	32.2787
ABS4-1C	Non-steeped	Null	3	35.1277	38.9231	38.9733	NA	38.9733	NA	NA	15.2107	NA	19.021	14.6924	14.8676	NA	37.117	17.3074	21.1946
ABS4-2A	Non-steeped	Null	1	39.4681	39.7639	38.1109	NA	38.1109	NA	NA	NA	NA	18.7611	12.6735	9.71331	NA	39.5433	15.0813	18.5105
ABS4-2A	Non-steeped	Null	2	NA	NA	NA	NA	NA	NA	NA	NA	NA	NA	NA	NA	NA	NA	NA	NA
ABS4-2A	Non-steeped	Null	3	50.4212	43.6727	45.7703	NA	45.7703	NA	NA	20.9163	NA	23.9749	22.6737	22.1049	NA	46.9399	23.4827	27.4023
ABS4-2B	Non-steeped	Null	1	58.0575	50.2869	53.3174	NA	53.3174	NA	NA	14.8105	NA	30.2652	25.8077	23.4436	NA	53.9978	27.8077	31.5746
ABS4-2B	Non-steeped	Null	2	42.8753	37.0817	39.3138	NA	39.3138	NA	NA	19.6577	NA	18.9349	17.3702	17.9082	NA	39.8548	18.1066	21.4261
ABS4-2B	Non-steeped	Null	3	42.4294	41.4915	42.9445	NA	42.9445	NA	NA	25.821	NA	24.5317	21.7342	22.7022	NA	42.0107	24.2225	27.2396
ABS4-2C	Non-steeped	Null	1	53.0051	48.2512	54.7824	NA	54.7824	NA	NA	27.0392	NA	30.8015	25.5943	26.6034	NA	50.7151	29.1723	33.8075
ABS4-2C	Non-steeped	Null	2	48.3713	43.0426	46.5464	NA	46.5464	NA	NA	NA	NA	20.5833	17.2175	12.5261	NA	45.5326	17.5174	23.0671
ABS4-2C	Non-steeped	Null	3	64.6218	58.3987	57.47	NA	57.47	NA	NA	27.4923	NA	40.3486	43.9023	38.729	NA	61.1343	39.7043	43.0563
ABS4-2D	Non-steeped	Null	1	52.5089	48.1198	47.3595	NA	47.3595	NA	NA	15.7821	NA	29.4439	13.3815	14.0578	NA	50.0284	23.8183	29.2774
ABS4-2D	Non-steeped	Null	2	58.3907	51.8964	55.4217	NA	55.4217	NA	NA	23.5375	NA	37.8294	40.781	35.0244	NA	54.9308	36.7869	40.7533
ABS4-2D	Non-steeped	Null	3	67.6515	61.3128	59.6852	NA	59.6852	NA	NA	36.9062	NA	35.3136	30.4243	32.664	NA	63.9802	34.9031	40.0987
Control	Non-steeped	Null	1	36.5781	35.0556	36.0241	NA	36.0241	NA	NA	NA	NA	19.6218	21.1501	12.7283	NA	35.8638	16.9067	21.3398
Control	Non-steeped	Null	2	53.0684	49.8162	55.3226	NA	55.3226	NA	NA	17.1451	NA	20.9132	19.5644	18.7178	NA	51.7473	20.429	28.0188
Control	Non-steeped	Null	3	56.2577	51.7679	56.2631	NA	56.2631	NA	NA	17.3189	NA	24.0831	26.2425	22.5188	NA	54.1824	23.4195	30.2803
ABS4-1A	Non-steeped	Present	1	39.3816	40.8849	28.4278	NA	35.7371	29.1792	29.4388	24.1861	20.2278	23.1518	43.8024	28.9355	29.819	39.651	24.4825	24.8431
ABS4-1A	Non-steeped	Present	2	32.5728	33.5886	28.1095	NA	35.4533	31.3333	NA	18.162	15.3446	16.4186	25.6817	20.7697	20.6261	33.1518	17.4804	18.0295
ABS4-1A	Non-steeped	Present	3	24.2001	24.5456	33.2003	NA	33.2003	22.8905	NA	13.1824	9.81383	10.4192	19.459	14.6756	10.0824	24.816	11.4679	12.1337
ABS4-1B	Non-steeped	Present	1	24.5512	26.0675	29.9439	23.8349	26.702	33.6061	23.7364	12.1721	13.7942	9.97127	14.5221	13.1608	13.6153	25.3738	10.8766	11.4095
ABS4-1B	Non-steeped	Present	2	26.847	28.6404	30.4771	22.3574	26.2346	23.5669	16.9998	10.5505	8.23838	9.40642	14.1658	11.7971	12.3463	27.4545	9.9783	10.5099
ABS4-1B	Non-steeped	Present	3	44.5364	44.413	50.1554	40.5754	45.0541	53.9662	NA	23.7019	20.0227	21.3117	40.0448	28.3715	26.0289	44.6219	22.8497	23.6573
ABS4-1C	Non-steeped	Present	1	38.7609	38.4956	42.6594	30.8821	39.1994	35.4463	31.4565	16.2371	10.2102	17.5407	15.7694	16.3138	14.4875	38.6405	16.8015	17.4811
ABS4-1C	Non-steeped	Present	2	43.1098	44.0979	50.44	26.9956	40.8877	26.2878	27.8117	23.7566	16.755	23.7299	16.2265	21.053	22.7526	43.1238	22.6668	23.2013
ABS4-1C	Non-steeped	Present	3	54.3029	55.1766	68.1686	35.3936	55.4796	49.8474	50.9855	26.2272	15.5685	29.6354	24.8365	26.0274	22.2107	54.6969	27.7771	28.632
ABS4-2A	Non-steeped	Present	1	26.4913	29.2521	30.4078	21.5981	24.5739	21.9221	22.1574	15.4018	12.7059	15.6943	16.5119	15.9803	15.7507	27.2742	15.5228	15.7949
ABS4-2A	Non-steeped	Present	2	24.8544	26.6469	33.743	21.0844	25.0708	20.619	23.2735	13.5627	11.3298	13.9026	13.9526	13.8957	15.6169	25.4373	13.7469	14.0195
ABS4-2A	Non-steeped	Present	3	27.1431	29.3323	26.8945	21.8016	23.7021	22.0565	24.6778	14.9854	12.9886	15.477	22.581	17.9721	18.2931	27.5937	15.8394	16.0347
ABS4-2B	Non-steeped	Present	1	27.5895	30.2582	31.3739	27.7284	29.1667	36.0614	19.298	19.1322	15.795	17.7693	23.388	20.5081	20.6094	28.8795	18.333	18.5696
ABS4-2B	Non-steeped	Present	2	27.9626	29.6087	33.9675	23.3459	27.2892	24.1086	18.1042	14.6287	10.872	15.1371	14.1985	14.5218	16.6306	28.4981	14.7745	15.0688
ABS4-2B	Non-steeped	Present	3	49.9074	49.2225	41.012	37.232	38.7022	32.3089	43.0241	27.5127	22.8843	28.8341	27.3141	27.6863	33.8006	48.276	28.283	28.5197
ABS4-2C	Non-steeped	Present	1	32.1701	35.6781	40.8977	31.1207	35.1888	34.3478	NA	18.3804	14.7016	18.386	11.9592	15.9425	17.6726	33.7274	17.5373	18.1287
ABS4-2C	Non-steeped	Present	2	45.3446	46.0417	52.5097	37.6235	43.4896	40.6634	NA	25.6752	24.3312	26.8399	27.6668	27.3233	24.7861	45.4341	26.7208	27.3464
ABS4-2C	Non-steeped	Present	3	NA	71.5312	86.754	59.1229	69.7339	72.2327	NA	43.3474	41.386	48.1158	40.4799	43.4108	47.4181	72.6326	46.5714	47.475
ABS4-2D	Non-steeped	Present	1	NA	NA	NA	NA	NA	NA	NA	NA	NA	NA	NA	NA	NA	NA	NA	NA
ABS4-2D	Non-steeped	Present	2	29.8184	31.7472	45.6826	NA	24.3106	20.5673	9.73729	17.6641	14.7592	20.7681	NA	10.7855	20.6314	30.0173	17.8894	18.0309
ABS4-2D	Non-steeped	Present	3	32.3418	35.4066	19.3407	48.5769	33.1078	27.1412	NA	14.2075	11.5686	18.4015	NA	9.51488	17.4328	33.5803	15.9859	16.4418
ABS4-1A	Steeped	Present	1	32.7293	35.9905	25.7641	NA	31.9897	49.5923	NA	12.9757	10.4108	16.2159	15.6047	14.1053	22.4254	34.1352	15.2956	15.8576
ABS4-1A	Steeped	Present	2	28.7836	28.7179	46.0311	NA	34.2575	26.3584	19.2333	13.2264	14.4494	12.5073	26.68	16.2487	13.6039	29.0984	13.6629	14.4182
ABS4-1A	Steeped	Present	3	42.1201	51.57	105.096	NA	46.3812	26.9633	NA	25.3187	24.6859	21.7871	34.2306	28.305	27.4646	45.7913	23.8072	24.5097
ABS4-1B	Steeped	Present	1	30.1585	30.4521	36.9344	29.9262	33.7849	29.8406	NA	13.1987	10.8619	12.5266	20.3143	15.0108	12.1578	30.514	13.0891	13.843
ABS4-1B	Steeped	Present	2	34.2522	35.3521	47.4062	28.9826	37.6872	32.4315	NA	15.4894	10.0925	16.9961	14.1962	15.0206	18.8804	34.8821	16.035	16.789
ABS4-1B	Steeped	Present	3	27.4034	24.2585	19.0281	NA	31.3112	33.915	NA	11.7628	8.42964	14.264	19.3666	13.4342	10.0735	26.4069	13.6767	14.3721
ABS4-1C	Steeped	Present	1	50.7543	50.9238	56.6205	61.499	57.9469	76.3609	NA	23.9989	23.495	27.7461	40.8924	29.4224	15.9901	51.4997	27.8922	29.1405
ABS4-1C	Steeped	Present	2	28.6525	24.8376	35.3518	43.512	37.328	36.5664	NA	9.53507	3.11554	11.098	12.8048	10.4402	2.29092	27.7493	10.0639	11.2683
ABS4-1C	Steeped	Present	3	32.1985	30.6136	42.3881	25.5408	36.2732	30.4143	NA	16.984	12.5986	19.3137	14.8883	16.6262	2.17556	31.798	17.0461	18.7268
ABS4-2A	Steeped	Present	1	25.9986	29.1775	48.5005	29.8348	36.3937	33.3726	NA	14.0627	12.2109	17.4837	16.2335	14.8657	17.8764	28.0377	16.3332	16.9308
ABS4-2A	Steeped	Present	2	24.6718	24.5282	31.0811	24.423	27.0379	22.3693	NA	8.78713	8.26069	11.7238	13.7825	10.6218	11.2945	24.7812	11.151	11.6849
ABS4-2A	Steeped	Present	3	26.6228	28.5041	33.268	22.764	26.7942	22.6999	NA	12.2035	11.767	13.0619	17.5717	14.0652	14.0037	27.2281	13.2312	13.6616
ABS4-2B	Steeped	Present	1	42.8636	42.8814	52.7694	38.2776	43.9132	36.0653	63.4774	24.6109	19.3587	28.5981	17.8514	22.0496	27.3635	42.8715	25.965	26.4418
ABS4-2B	Steeped	Present	2	54.3838	53.8286	61.213	41.2197	48.1912	26.4925	26.9359	22.0054	16.8105	23.5884	14.9406	19.3736	20.1467	53.0379	21.8769	22.6981
ABS4-2B	Steeped	Present	3	50.6553	51.732	62.6356	41.1907	49.3866	39.7565	111.601	22.1283	16.8613	23.1267	17.1001	20.4555	27.3306	50.805	22.0225	22.782
ABS4-2C	Steeped	Present	1	41.3421	40.8049	50.8544	37.7518	43.6761	41.7017	NA	16.6109	14.4178	21.673	20.5514	18.0225	19.1943	41.3235	20.0053	20.8902
ABS4-2C	Steeped	Present	2	34.3518	35.399	36.4406	23.9751	29.6031	18.7216	NA	13.7904	11.5509	16.773	18.3465	15.4015	13.7992	34.1193	15.9822	16.5239
ABS4-2C	Steeped	Present	3	35.9774	37.7616	43.6693	30.1206	36.2482	32.4175	NA	14.9532	13.2086	20.8194	20.0796	16.6648	17.315	36.6329	18.9984	19.6827
ABS4-2D	Steeped	Present	1	20.5468	20.4346	25.5583	11.8685	19.2632	NA	NA	9.87326	7.22406	11.8046	NA	6.60454	9.63657	20.1003	9.94764	10.1719
ABS4-2D	Steeped	Present	2	27.0386	27.2501	55.2775	5.47486	33.7964	8.3262	NA	16.5768	14.273	19.6637	NA	11.3418	16.5555	27.3994	16.8469	17.3064
ABS4-2D	Steeped	Present	3	36.303	34.751	70.5436	NA	39.8479	26.686	NA	13.6415	9.7957	15.7187	NA	8.46809	11.0252	35.7968	13.0308	13.8734
NA indicates analyte was not detected in aqueous and/or digesta sample (signal to noise ratio < 3) or sample was missing (NA for all analytes)
Relative bioaccessibility reported as a percent of micellerized carotenoids in the aqueous fraction relative to the amount in the digesta fraction
CombACryp represents the sum of 13 cis alpha cryptoxanthin and all-trans cryptoxanthin
cisBetaCaro represents the sum of 9, 13, and 15 cis beta carotene
Xanthophylls represent the sum of xanthophyll carotenoids (lutein, zeaxanthin, and ⍺ and β-cryptoxanthin)
Carotenes represent the sum of ⍺ and β-carotene, cis-β-carotene isomers, and lycopene
Provitamin A was calculated as the sum of β-carotene plus half of the sum of ⍺ and β-cryptoxanthin, ⍺-carotene, 15-cis-β-carotene, 13-cis-β-carotene, and 9-cis-β-carotene.

## Sheet: 3
Event_Name	Treatment	Transgenic	Rep	Lutein	Zeaxanthin	13cisAlphaCryp	AlphaCryp	CombACryp	BetaCryp	15cisBetaCaro	13cisBetaCaro	AlphaCaro	BetaCaro	9cisBetaCaro	cisBetaCaro	Lycopene	Xanthophylls	Carotenes	ProvitaminA
ABS4-1A	Non-steeped	Null	1	19.771	23.8448	2.06125	NA	2.06125	NA	NA	0.0761	NA	2.55064	0.709418	0.689517	NA	45.898	3.12572	4.23982
ABS4-1A	Non-steeped	Null	2	18.7794	26.206	0.425018	NA	0.425018	NA	NA	0.0463	NA	2.14987	0.715354	0.580837	NA	45.1819	2.56654	3.24539
ABS4-1A	Non-steeped	Null	3	20.8554	28.2343	2.18248	NA	2.18248	NA	NA	0.0428	NA	3.57628	1.41928	1.09403	NA	51.3013	4.82486	5.64185
ABS4-1B	Non-steeped	Null	1	28.3653	31.9253	1.85161	NA	1.85161	NA	NA	NA	NA	4.33624	2.05039	1.16598	NA	61.96	5.54281	6.29561
ABS4-1B	Non-steeped	Null	2	25.3682	25.9548	1.79179	NA	1.79179	NA	NA	0.137	NA	4.01231	1.20185	1.12238	NA	53.1417	5.20973	5.83703
ABS4-1B	Non-steeped	Null	3	14.7935	14.8921	1.28819	NA	1.28819	NA	NA	0.0658	NA	2.77131	1.12187	0.918454	NA	31.0474	3.78026	4.13219
ABS4-1C	Non-steeped	Null	1	19.2107	26.9586	0.405362	NA	0.405362	NA	NA	0.111	NA	4.4513	1.50943	1.13293	NA	45.7731	5.58683	5.46154
ABS4-1C	Non-steeped	Null	2	25.8948	34.6395	0.813659	NA	1.89335	NA	NA	0.194	NA	4.92589	1.74374	1.32254	NA	62.3923	6.54332	7.16437
ABS4-1C	Non-steeped	Null	3	21.2921	29.5021	2.05718	NA	2.05718	NA	NA	0.136	NA	2.92658	1.82816	1.88843	NA	52.5902	4.93994	5.2146
ABS4-2A	Non-steeped	Null	1	26.651	27.9496	1.58804	NA	1.58804	NA	NA	NA	NA	3.21526	0.541683	0.442582	NA	56.1439	3.31937	4.00888
ABS4-2A	Non-steeped	Null	2	NA	NA	NA	NA	NA	NA	NA	NA	NA	NA	NA	NA	NA	NA	NA	NA
ABS4-2A	Non-steeped	Null	3	29.5344	26.5922	1.55176	NA	1.55176	NA	NA	0.186	NA	3.4681	1.30398	1.27127	NA	57.6683	4.83073	5.26499
ABS4-2B	Non-steeped	Null	1	35.3298	37.5118	1.62767	NA	2.68509	NA	NA	0.132	NA	6.15554	1.62785	1.47874	NA	75.8586	7.40971	8.21272
ABS4-2B	Non-steeped	Null	2	28.668	30.1471	1.83183	NA	1.83183	NA	NA	0.175	NA	4.02334	1.17754	1.21402	NA	60.907	5.22559	5.86732
ABS4-2B	Non-steeped	Null	3	28.7466	31.7624	1.86248	NA	1.86248	NA	NA	0.23	NA	4.02966	0.91371	1.03775	NA	62.4448	5.08612	5.68774
ABS4-2C	Non-steeped	Null	1	37.016	39.9309	0.738718	NA	0.738718	NA	NA	0.241	NA	8.2795	3.2206	3.34757	NA	77.3866	11.5124	11.2146
ABS4-2C	Non-steeped	Null	2	34.9051	36.0929	0.627658	NA	0.627658	NA	NA	NA	NA	4.72654	0.776262	0.599836	NA	71.0375	4.86137	5.8492
ABS4-2C	Non-steeped	Null	3	51.0297	49.9268	2.53736	NA	2.53736	NA	NA	0.245	NA	8.62964	1.59285	1.52067	NA	103.24	10.4514	11.2218
ABS4-2D	Non-steeped	Null	1	31.1499	39.5832	2.90558	NA	2.90558	NA	NA	0.141	NA	4.7914	0.682833	0.717344	NA	73.901	5.20922	6.48184
ABS4-2D	Non-steeped	Null	2	33.207	41.2441	1.94745	NA	2.94911	NA	NA	0.21	NA	6.73771	1.09644	1.05734	NA	77.8179	7.66258	8.9579
ABS4-2D	Non-steeped	Null	3	39.4306	48.9242	3.72346	NA	3.72346	NA	NA	0.329	NA	6.92184	1.78579	1.91725	NA	92.3348	9.1644	10.445
Control	Non-steeped	Null	1	24.9181	20.9289	1.82761	NA	1.82761	NA	NA	NA	NA	2.05837	1.11296	0.669789	NA	47.6625	2.74847	3.39519
Control	Non-steeped	Null	2	36.1497	31.0195	2.87865	NA	2.87865	NA	NA	0.153	NA	2.20546	1.41002	1.40935	NA	70.1645	3.74977	4.77779
Control	Non-steeped	Null	3	32.831	31.3711	2.40035	NA	2.40035	NA	NA	0.154	NA	2.90964	1.4817	1.37692	NA	66.7657	4.51764	5.39565
ABS4-1A	Non-steeped	Present	1	74.3841	79.4212	2.70473	NA	5.97989	2.55671	0.262329	6.79658	3.25775	136.181	0.390322	8.13121	2.84821	162.026	157.17	154.787
ABS4-1A	Non-steeped	Present	2	62.4576	64.3001	2.7758	NA	6.18936	2.69212	NA	5.60368	2.62426	94.7429	0.228849	7.54942	2.38382	135.668	112.234	111.206
ABS4-1A	Non-steeped	Present	3	47.4194	48.3244	2.40073	NA	6.64265	2.83946	NA	4.79901	1.96311	60.26	0.173399	6.69736	0.9915	105.526	74.9804	76.1243
ABS4-1B	Non-steeped	Present	1	49.0311	39.1795	1.25874	3.85	5.43653	3.78681	1.94589	3.3593	2.19065	60.5557	0.129407	4.71106	0.947686	96.836	72.4318	74.0424
ABS4-1B	Non-steeped	Present	2	52.445	43.3737	1.22264	3.7	5.39222	3.18995	1.33944	2.90841	1.29266	57.0474	0.126231	4.18154	1.02851	104.568	66.4494	68.2181
ABS4-1B	Non-steeped	Present	3	93.0492	69.4748	1.33578	6.09	7.96151	5.25724	NA	7.62439	3.34493	134.346	0.356839	11.5812	1.94527	175.262	158.893	159.179
ABS4-1C	Non-steeped	Present	1	75.7144	64.727	3.62981	2.16	6.07296	3.62049	1.94077	4.78133	1.65946	113.065	0.140521	5.81044	1.29029	150.383	118.511	119.461
ABS4-1C	Non-steeped	Present	2	85.0757	72.2415	1.19718	0.364	0.970457	2.36418	1.64747	7.56139	2.51814	149.5	0.144594	7.94795	2.09907	160.651	156.857	153.611
ABS4-1C	Non-steeped	Present	3	102.092	85.2516	9.58152	0.477	7.79801	4.52005	3.74452	8.12569	2.37783	177.863	0.221318	9.97532	1.60957	199.99	183.612	182.824
ABS4-2A	Non-steeped	Present	1	48.3723	36.8472	0.81789	3.78	4.9648	0.848672	1.216	2.59373	4.54977	94.3003	0.147137	3.56816	3.79267	90.7238	106.032	101.397
ABS4-2A	Non-steeped	Present	2	43.5184	32.5749	0.45501	4.22	5.0139	2.0113	2.126	2.62388	4.0831	81.8546	0.124331	3.95767	3.89087	83.2039	93.2319	89.1507
ABS4-2A	Non-steeped	Present	3	52.1828	38.3417	0.525014	4.31	5.15357	2.55732	2.47278	2.96908	4.96861	97.4266	0.201219	5.36171	4.60677	98.3171	114.481	109.069
ABS4-2B	Non-steeped	Present	1	53.7268	45.2675	0.908419	7.12	8.33804	6.13236	3.1681	6.30493	7.85846	152.695	0.20841	10.1251	6.04479	112.611	181.088	173.009
ABS4-2B	Non-steeped	Present	2	53.4355	44.3275	1.0067	5.19	6.87868	2.88552	0.161326	3.25342	3.79045	126.444	0.126522	3.22965	4.65208	107.718	135.986	132.978
ABS4-2B	Non-steeped	Present	3	90.7614	73.9907	0.55303	0.502	0.521883	0.466864	0.383387	6.66368	0.261421	247.275	0.243396	6.70572	9.63036	160.363	257.458	248.033
ABS4-2C	Non-steeped	Present	1	45.7008	44.8464	1.22873	3.67	5.20422	2.68957	NA	2.89737	3.11426	91.0192	0.106569	2.51307	3.9362	97.9366	97.2033	95.1445
ABS4-2C	Non-steeped	Present	2	63.9409	56.8778	1.75992	4.99	7.22458	3.54705	NA	4.28996	5.32137	134.038	0.246539	4.56534	5.43731	131.705	149.614	145.306
ABS4-2C	Non-steeped	Present	3	NA	96.1355	2.16721	8.12	11.3182	5.80639	NA	7.70648	9.81139	251.257	0.360716	7.71775	10.527	223.314	272.852	263.52
ABS4-2D	Non-steeped	Present	1	NA	NA	NA	NA	NA	NA	NA	NA	NA	NA	NA	NA	NA	NA	NA	NA
ABS4-2D	Non-steeped	Present	2	37.1609	42.0666	1.68678	NA	3.21321	1.97534	0.622642	3.76974	3.50079	121.608	NA	2.99144	5.34874	84.0336	118.595	112.276
ABS4-2D	Non-steeped	Present	3	45.9969	48.4707	0.48395	5.99	4.90853	2.95088	NA	2.9362	2.80966	111.114	NA	1.96639	4.62239	102.359	107.954	105.09
ABS4-1A	Steeped	Present	1	61.8192	69.9136	2.4513	NA	5.35284	4.34532	NA	3.64633	1.67669	95.3832	0.139053	3.96376	2.142	139.487	98.1926	98.8027
ABS4-1A	Steeped	Present	2	55.192	54.9759	4.54554	NA	5.9806	2.26468	1.05674	4.08084	2.47117	72.173	0.237745	5.90612	1.57225	119.08	87.7231	88.931
ABS4-1A	Steeped	Present	3	82.5333	101.529	7.59952	NA	9.27987	3.34467	NA	9.2172	4.93806	126.007	0.305028	12.9172	2.70086	194.721	155.658	153.769
ABS4-1B	Steeped	Present	1	60.2294	45.7694	1.55259	4.83	6.87861	3.36251	NA	3.64262	1.72497	76.0742	0.18102	5.3733	0.846239	116.453	87.1655	89.8346
ABS4-1B	Steeped	Present	2	66.9108	53.5379	1.90178	4.79	7.74617	4.38984	NA	4.26988	1.58359	103.077	0.126502	5.32413	1.57283	132.859	106.784	108.975
ABS4-1B	Steeped	Present	3	57.2535	37.9473	0.506772	NA	5.53299	3.3039	NA	3.78384	1.40823	89.9179	0.172575	5.48381	0.752838	103.718	95.1053	96.7034
ABS4-1C	Steeped	Present	1	99.142	85.624	4.81774	4.29	8.9774	7.79953	NA	7.06696	3.81863	178.847	0.364392	10.4793	1.42412	200.429	196.74	199.138
ABS4-1C	Steeped	Present	2	56.5448	40.6892	0.839065	0.587	0.885968	3.28857	NA	3.03487	0.468242	69.9181	0.114103	3.94139	0.211352	103.376	69.6435	74.6049
ABS4-1C	Steeped	Present	3	60.5345	47.3	5.95792	0.344	5.09843	2.7579	NA	5.26196	1.92423	115.915	0.132669	6.37217	0.157659	116.264	112.678	119.577
ABS4-2A	Steeped	Present	1	47.4726	36.7533	1.30454	5.23	7.35281	1.29195	NA	2.36822	4.37254	105.052	0.144656	3.3193	4.30453	93.2634	111.568	108.69
ABS4-2A	Steeped	Present	2	43.1988	29.9849	0.419115	4.88	5.40729	2.18204	NA	1.69999	2.97705	69.0261	0.122815	3.02523	2.81397	81.0578	75.6267	74.3052
ABS4-2A	Steeped	Present	3	51.1824	37.2591	0.649434	4.51	5.82588	2.63191	NA	2.41789	4.50131	82.2239	0.156582	4.19611	3.52657	97.0144	95.6304	92.927
ABS4-2B	Steeped	Present	1	83.471	64.1523	1.52792	9.83	12.5537	6.13302	10.4209	8.11041	9.6315	245.749	0.159074	10.8862	8.02581	167.17	256.476	246.352
ABS4-2B	Steeped	Present	2	103.925	80.5875	1.81418	9.17	12.1474	3.17085	0.240026	4.89402	5.86089	197.041	0.133135	4.30869	5.63565	200.474	201.356	200.303
ABS4-2B	Steeped	Present	3	92.1215	77.7628	0.844615	0.555	0.665957	0.574482	0.994478	5.35955	0.192617	198.33	0.152379	4.95439	7.78694	168.763	200.469	198.132
ABS4-2C	Steeped	Present	1	58.7305	51.2908	1.52787	4.45	6.45943	3.26541	NA	2.61843	3.05414	107.291	0.183134	2.84096	4.27513	119.994	110.883	109.638
ABS4-2C	Steeped	Present	2	48.4398	43.7303	1.22135	3.18	4.91772	1.63307	NA	2.30417	2.52624	83.7641	0.163485	2.57337	3.02712	98.9055	89.4864	87.8006
ABS4-2C	Steeped	Present	3	53.5314	50.7503	1.09091	4.14	5.8833	2.60586	NA	2.65844	3.13137	108.717	0.17893	2.96273	3.84398	112.63	111.308	109.253
ABS4-2D	Steeped	Present	1	27.4852	27.2316	1.09526	1.05	2.53458	NA	NA	1.93649	1.71343	71.8944	NA	1.29538	2.36891	58.3597	67.3406	65.3402
ABS4-2D	Steeped	Present	2	33.6967	36.1078	2.04107	0.521	4.46698	0.799671	NA	3.5377	3.38546	115.141	NA	3.14572	4.29207	76.7048	111.684	107.765
ABS4-2D	Steeped	Present	3	51.6305	47.5732	1.76516	NA	5.90781	2.9014	NA	2.81922	2.37908	94.9149	NA	1.75006	2.9234	109.115	87.9972	88.6734
NA indicates analyte was not detected in aqueous and/or digesta sample (signal to noise ratio < 3) or sample was missing (NA for all analytes)
Absolute bioaccessibility reported as µg carotenoid available for absorption per 40 g of flour (200 g porridge serving)
Xanthophylls represent the sum of xanthophyll carotenoids (lutein, zeaxanthin, and ⍺ and β-cryptoxanthin)
Carotenes represent the sum of ⍺ and β-carotene, cis-β-carotene isomers, and lycopene
Provitamin A was calculated as the sum of β-carotene plus half of the sum of ⍺ and β-cryptoxanthin, ⍺-carotene, 15-cis-β-carotene, 13-cis-β-carotene, and 9-cis-β-carotene.

## Sheet: 4
Event_Name	Transgenic	Rep	P	K	Mg	Ca	S	Zn	Mn	Cu	Fe	B	Al
Control	Null	1	86.4	124	44	16	32	0.696	0.61	0.0508	1.428	0.1784	0.534
Control	Null	2	89.6	124	44	12	40	1.3276	0.6168	0.0424	1.354	0.1296	0.3472
Control	Null	3	96.4	132	48	12	40	0.8628	0.5384	0.0564	1.044	0.2644	0.3412
ABS4-1A	Null	1	128.4	148	60	12	44	1.4308	0.8316	0.0776	1.2712	0.1688	0.3344
ABS4-1A	Null	2	133.6	148	60	12	44	1.4856	0.7944	0.112	1.426	0.078	0.3924
ABS4-1A	Null	3	136.4	156	64	16	48	1.2324	0.9268	0.1116	1.3076	0.2016	0.3656
ABS4-1B	Null	1	128	140	56	16	44	1.3924	0.8552	0.0832	1.298	0.1652	0.2604
ABS4-1B	Null	2	125.2	132	56	28	36	1.1092	0.8084	0.0996	1.4468	0.186	1.4228
ABS4-1B	Null	3	169.2	172	76	20	48	1.5412	1.0864	0.1096	1.772	0.2768	0.5348
ABS4-1C	Null	1	115.2	136	56	12	40	1.3704	0.7736	0.0772	1.2836	0.1168	0.2148
ABS4-1C	Null	2	110.8	132	52	12	40	1.1652	0.692	0.1132	0.982	0.1456	0.7336
ABS4-1C	Null	3	135.2	164	64	16	52	1.4916	0.8872	0.1092	1.874	0.2476	0.4828
ABS4-2A	Null	1	139.2	152	68	24	44	1.6776	0.9184	0.0948	3.0516	0.1516	0.6164
ABS4-2A	Null	2	149.6	164	72	20	44	1.5772	0.9252	0.1076	2.7772	0.1144	0.8768
ABS4-2A	Null	3	131.6	156	64	24	40	1.3296	0.8776	0.0872	1.8024	0.1844	0.6912
ABS4-2B	Null	1	126.4	128	64	16	40	1.4188	0.8592	0.0724	1.4728	0.186	0.2436
ABS4-2B	Null	2	146	144	68	16	48	1.4884	0.954	0.1508	1.4188	0.0964	0.2772
ABS4-2B	Null	3	138.8	144	64	16	48	1.2856	0.972	0.088	1.5552	0.1952	0.3136
ABS4-2C	Null	1	104.4	100	48	12	40	1.2164	0.7324	0.0876	1.37	0.13	0.2596
ABS4-2C	Null	2	116.8	108	56	12	40	1.1088	0.7444	0.1064	1.246	0.086	0.3212
ABS4-2C	Null	3	136	132	64	16	44	1.3192	0.942	0.1252	1.4628	0.2012	0.3496
ABS4-2D	Null	1	121.6	120	56	16	44	1.9544	0.96	0.1196	1.8056	0.1924	0.2528
ABS4-2D	Null	2	141.2	140	64	20	48	1.6328	1.0432	0.146	2.0252	0.1664	0.4224
ABS4-2D	Null	3	155.6	156	72	16	52	1.7684	1.2252	0.1388	2.1188	0.2508	0.2628
ABS4-1A	Present	1	128.4	168	52	12	44	1.3044	0.8184	0.08	1.1496	0.1436	0.2244
ABS4-1A	Present	2	150.8	188	60	16	44	1.3096	0.896	0.1164	1.4168	0.0792	0.2804
ABS4-1A	Present	3	162.8	208	64	16	48	1.3308	1.0144	0.1156	1.4836	0.1772	0.2468
ABS4-1B	Present	1	134	156	60	16	44	1.4976	1.0044	0.0828	1.462	0.1692	0.318
ABS4-1B	Present	2	139.2	160	60	16	44	1.354	0.9428	0.152	1.4564	0.2288	0.5804
ABS4-1B	Present	3	197.6	220	84	16	52	1.8432	1.358	0.1472	1.628	0.2388	0.3412
ABS4-1C	Present	1	137.6	176	60	16	56	1.56	1.0264	0.11	1.3696	0.1496	0.3348
ABS4-1C	Present	2	129.2	160	64	20	44	1.2692	0.8852	0.1232	1.5628	0.1284	0.9788
ABS4-1C	Present	3	164	200	72	16	56	1.636	1.1704	0.1388	2.5556	0.2024	0.6008
ABS4-2A	Present	1	150.8	156	68	16	48	2.2224	0.9056	0.166	1.72	0.182	0.2684
ABS4-2A	Present	2	171.6	172	76	12	52	1.876	0.9312	0.1728	1.6844	0.232	0.2676
ABS4-2A	Present	3	164.4	176	76	24	52	1.764	1.168	0.222	2.9156	0.2588	0.916
ABS4-2B	Present	1	139.2	144	68	16	48	1.5072	1.0088	0.052	1.376	0.1432	0.3168
ABS4-2B	Present	2	145.6	148	68	16	48	2.0912	0.9624	0.17	1.2344	0.126	0.2356
ABS4-2B	Present	3	136.4	144	68	16	44	1.2604	1.0256	0.1192	1.3788	0.188	0.3792
ABS4-2C	Present	1	110.4	112	52	16	40	1.3896	0.7288	0.0796	1.5328	0.1448	0.2552
ABS4-2C	Present	2	155.2	148	72	16	48	1.6424	0.9296	0.1676	1.5796	0.1112	0.1304
ABS4-2C	Present	3	166.8	164	76	16	56	1.7192	1.0428	0.1592	1.9984	0.2256	0.2732
ABS4-2D	Present	1	154	156	68	20	48	1.4368	1.0596	0.1168	1.8108	0.152	0.3748
ABS4-2D	Present	2	153.6	156	68	16	44	1.6236	1.0872	0.1128	1.4848	0.1908	0.3204
ABS4-2D	Present	3	175.2	180	76	16	56	1.524	1.2688	0.1348	1.5192	0.26	0.4956
Mineral concentrations reported as mg per 40 g of flour (200 g porridge serving)

## Sheet: 5
Event_Name	Treatment	Transgenic	Rep	IP1	IP2_1	IP2_2	Total IP2	IP3_1	IP3_2	IP3_3	Total IP3	IP4	IP5	IP6	Total phytates
Control	Non-steeped	Null	1	0.196	0.204	0.012	0.412	0.196	0.228	0.088	0.512	9.188	22.428	161.6	194.4
Control	Non-steeped	Null	2	0.216	0.404	0.008	0.628	0.424	0.42	0.104	0.948	13.824	29.72	226	270.8
Control	Non-steeped	Null	3	0.232	0.328	0.132	0.692	0.36	0.336	0.092	0.788	13.452	29.224	215.6	259.6
ABS4-1A	Non-steeped	Null	1	0.244	0.12	0.008	0.372	0.096	0.148	0.076	0.32	11.728	29.084	306.8	348.4
ABS4-1A	Non-steeped	Null	2	0.244	0.112	0.008	0.364	0.092	0.188	0.084	0.364	13.18	30.124	329.2	373.2
ABS4-1A	Non-steeped	Null	3	0.28	0.104	0.012	0.396	0.064	0.148	0.084	0.296	11.616	29.908	306.4	348.4
ABS4-1B	Non-steeped	Null	1	0.26	0.16	0.012	0.432	0.112	0.148	0.072	0.328	12.416	30.32	315.2	358.8
ABS4-1B	Non-steeped	Null	2	0.16	0.132	0.012	0.304	0.204	0.06	0.064	0.328	11.732	30.928	320.4	363.6
ABS4-1B	Non-steeped	Null	3	0.28	0.144	0.008	0.432	0.116	0.124	0.056	0.296	9.264	24.772	244.4	279.2
ABS4-1C	Non-steeped	Null	1	0.26	0.148	0.012	0.42	0.076	0.176	0.076	0.328	10.904	28.104	295.6	335.2
ABS4-1C	Non-steeped	Null	2	0.148	0.096	0.012	0.256	0.152	0.06	0.08	0.288	11.94	30.532	317.6	360.8
ABS4-1C	Non-steeped	Null	3	0.248	0.148	0.012	0.408	0.088	0.18	0.08	0.348	13.12	31.332	339.6	384.8
ABS4-2A	Non-steeped	Null	1	0.22	0.136	0.008	0.364	0.112	0.14	0.068	0.324	14.188	32.992	366.8	414.4
ABS4-2A	Non-steeped	Null	2	0.232	0.116	0.008	0.356	0.088	0.112	0.068	0.268	12.4	29.224	323.2	365.2
ABS4-2A	Non-steeped	Null	3	0.232	0.124	0.012	0.368	0.088	0.124	0.068	0.276	12.064	28.564	322.8	364
ABS4-2B	Non-steeped	Null	1	0.276	0.12	0.012	0.408	0.096	0.108	0.064	0.264	9.572	25.504	251.6	287.2
ABS4-2B	Non-steeped	Null	2	0.296	0.108	0.012	0.416	0.092	0.108	0.06	0.26	10.176	27.112	269.2	307.2
ABS4-2B	Non-steeped	Null	3	0.252	0.116	0.008	0.376	0.076	0.112	0.068	0.256	11.628	27.244	287.2	326.8
ABS4-2C	Non-steeped	Null	1	0.172	0.136	0.012	0.32	0.088	0.18	0.08	0.348	11.892	31.46	320.8	364.8
ABS4-2C	Non-steeped	Null	2	0.276	0.136	0.048	0.46	0.12	0.124	0.06	0.304	11.132	25.968	270.8	308.8
ABS4-2C	Non-steeped	Null	3	0.188	0.12	0.012	0.32	0.1	0.096	0.06	0.256	9.352	26.084	252	288
ABS4-2D	Non-steeped	Null	1	0.292	0.436	0.012	0.74	0.244	0.216	0.052	0.508	13.44	30.912	318	363.6
ABS4-2D	Non-steeped	Null	2	0.248	0.18	0.008	0.436	0.144	0.144	0.052	0.34	10.424	25.94	274	311.2
ABS4-2D	Non-steeped	Null	3	0.296	0.168	0.008	0.472	0.14	0.14	0.06	0.336	10.136	26.796	262	299.6
ABS4-1A	Non-steeped	Present	1	0.704	1.264	0.04	2.008	0.612	1.656	0.292	2.556	17.964	41.328	318.4	382.4
ABS4-1A	Non-steeped	Present	2	0.432	0.696	0.016	1.144	0.376	0.808	0.156	1.336	16.94	41.932	338	399.2
ABS4-1A	Non-steeped	Present	3	0.384	0.776	0.02	1.18	0.46	1.032	0.212	1.704	15.08	35.344	264.8	318
ABS4-1B	Non-steeped	Present	1	0.184	0.312	0.012	0.508	0.176	0.344	0.088	0.608	13.232	35.192	334.4	384
ABS4-1B	Non-steeped	Present	2	0.304	0.352	0.012	0.668	0.244	0.456	0.088	0.784	13.744	36.68	325.6	377.2
ABS4-1B	Non-steeped	Present	3	0.32	0.38	0.012	0.712	0.152	0.516	0.096	0.764	12.92	34.916	313.2	362.8
ABS4-1C	Non-steeped	Present	1	0.192	0.34	0.012	0.544	0.212	0.428	0.116	0.756	16.352	40.424	398.8	456.8
ABS4-1C	Non-steeped	Present	2	0.544	1.272	0.032	1.848	0.7	1.088	0.212	2	19.86	46.896	380.8	451.2
ABS4-1C	Non-steeped	Present	3	0.304	0.404	0.012	0.72	0.248	0.416	0.116	0.784	13.8	35.308	315.2	365.6
ABS4-2A	Non-steeped	Present	1	0.292	0.428	0.012	0.732	0.308	0.484	0.104	0.896	17.008	41.464	368.4	428.8
ABS4-2A	Non-steeped	Present	2	0.3	0.464	0.012	0.776	0.3	0.46	0.1	0.86	18.216	44.128	425.6	489.6
ABS4-2A	Non-steeped	Present	3	0.352	0.892	0.02	1.264	0.572	1.296	0.216	2.088	18.604	42.964	371.6	436.8
ABS4-2B	Non-steeped	Present	1	0.428	0.832	0.028	1.288	0.312	0.716	0.136	1.16	13.388	33.064	288.4	337.2
ABS4-2B	Non-steeped	Present	2	0.424	0.604	0.02	1.048	0.256	0.116	0.132	0.504	15.084	34.232	290.8	341.6
ABS4-2B	Non-steeped	Present	3	0.176	0.26	0.012	0.448	0.16	0.296	0.1	0.556	16.192	41.42	352	410.4
ABS4-2C	Non-steeped	Present	1	0.392	0.784	0.016	1.192	0.412	1.244	0.204	1.86	16.664	40.656	317.2	377.6
ABS4-2C	Non-steeped	Present	2	0.496	0.892	0.032	1.42	0.464	1.096	0.208	1.768	16.712	38.616	339.6	398
ABS4-2C	Non-steeped	Present	3	0.36	0.4	0.012	0.772	0.332	0.188	0.1	0.62	11.492	27.472	256.4	296.8
ABS4-2D	Non-steeped	Present	1	0.2	0.464	0.008	0.672	0.272	0.504	0.092	0.868	15.984	40.74	360	418.4
ABS4-2D	Non-steeped	Present	2	0.364	0.736	0.024	1.124	1.208	0.112	0.152	1.472	15.636	37.004	317.6	372.8
ABS4-2D	Non-steeped	Present	3	0.376	0.74	0.2	1.316	0.556	0.804	0.128	1.484	19.2	44.424	398.8	465.2
Control	Steeped	Null	1	0.74	3.72	NA	4.46	1.932	3.92	0.376	6.232	66.576	35.628	240	352.8
Control	Steeped	Null	2	0.708	2.976	NA	3.684	1.004	3.804	0.22	5.024	54.716	32.732	221.6	318
Control	Steeped	Null	3	0.792	2.892	NA	3.684	1.648	2.972	0.216	4.836	49.448	30.424	198.4	286.8
ABS4-1A	Steeped	Null	1	0.96	4.088	NA	5.048	2.616	5.808	0.404	8.828	94.096	39.612	239.2	386.8
ABS4-1A	Steeped	Null	2	0.928	4.316	NA	5.244	2.932	6.044	0.376	9.352	96.424	40.88	268	420
ABS4-1A	Steeped	Null	3	0.948	4.736	NA	5.684	4.004	6.08	0.44	10.524	109.764	48.676	317.2	491.6
ABS4-1B	Steeped	Null	1	0.872	2.4	NA	3.272	1.076	4.364	0.28	5.72	76.264	39.18	250	374.4
ABS4-1B	Steeped	Null	2	0.796	2.456	NA	3.252	1.208	4.332	0.28	5.82	79.552	40.588	241.6	370.8
ABS4-1B	Steeped	Null	3	0.984	2.592	NA	3.576	3.072	2.724	0.312	6.108	77.188	42.284	273.6	402.8
ABS4-1C	Steeped	Null	1	1.228	4.068	NA	5.296	3.436	4.392	0.328	8.156	72.056	32.796	206.4	324.4
ABS4-1C	Steeped	Null	2	1.12	5.056	NA	6.176	3.02	6.608	0.552	10.18	95.804	39.776	247.6	399.6
ABS4-1C	Steeped	Null	3	0.984	4.888	NA	5.872	2.76	6.508	0.396	9.664	91.884	35.424	194	336.8
ABS4-2A	Steeped	Null	1	0.864	3.724	NA	4.588	2.476	5.932	0.46	8.868	99.568	43.96	238	394.8
ABS4-2A	Steeped	Null	2	0.824	3.048	NA	3.872	3.376	3.584	0.328	7.288	80.796	38.752	254.4	385.2
ABS4-2A	Steeped	Null	3	0.908	3.476	NA	4.384	2.548	5.648	0.348	8.544	91.1	41.16	246.8	392
ABS4-2B	Steeped	Null	1	1.104	4.696	NA	5.8	3.072	7.68	0.472	11.22	88.772	36.968	215.2	358
ABS4-2B	Steeped	Null	2	0.916	4.724	NA	5.64	2.164	6.924	0.424	9.512	93.064	38.184	240.8	387.2
ABS4-2B	Steeped	Null	3	0.868	4.948	NA	5.816	3.084	6.112	0.452	9.648	96.256	40.424	262.4	414.4
ABS4-2C	Steeped	Null	1	1.072	4.604	NA	5.676	3.76	4.46	0.32	8.54	74.456	33.06	243.2	364.8
ABS4-2C	Steeped	Null	2	1.212	4.904	NA	6.116	4.208	4.584	0.324	9.116	78.88	32.156	203.2	329.6
ABS4-2C	Steeped	Null	3	0.976	6.68	NA	7.656	4.384	7.292	0.616	12.292	113.1	43.528	265.2	441.6
ABS4-2D	Steeped	Null	1	0.844	2.784	NA	3.628	2.016	4.088	0.364	6.468	91.116	46.12	303.6	450.8
ABS4-2D	Steeped	Null	2	0.832	2.56	NA	3.392	1.684	4.064	0.26	6.004	80.632	39.996	256	386
ABS4-2D	Steeped	Null	3	1.028	3.296	NA	4.324	2.38	4.468	0.456	7.304	95.372	43.472	253.2	403.6
ABS4-1A	Steeped	Present	1	25.244	5.3	0.252	30.796	0.632	2.152	0.644	3.428	7.824	11.076	89.2	142.4
ABS4-1A	Steeped	Present	2	25.428	6.276	0.248	31.952	1.48	6.748	1.736	9.964	24.824	16.208	48	131.2
ABS4-1A	Steeped	Present	3	23.928	5.608	0.2	29.736	0.832	3.08	0.916	4.828	9.06	9.844	62.4	116
ABS4-1B	Steeped	Present	1	22.176	6.04	0.144	28.36	0.808	2.98	0.728	4.516	10.872	13.108	111.6	168.4
ABS4-1B	Steeped	Present	2	23.068	9.952	0.36	33.38	2.504	7.208	1.716	11.432	19.664	17.144	102.4	184
ABS4-1B	Steeped	Present	3	24.424	6.216	0.132	30.772	0.936	2.376	0.556	3.868	10.664	13.924	126.4	185.6
ABS4-1C	Steeped	Present	1	26.036	11.7	1.112	38.848	3.296	10.008	2.668	15.972	25.652	18.392	73.2	172
ABS4-1C	Steeped	Present	2	24.676	12.976	0.7	38.352	4.6	12.124	3.016	19.74	28.956	17.656	56.4	161.2
ABS4-1C	Steeped	Present	3	23.736	6.952	0.444	31.132	1.132	3.652	0.988	5.768	12.092	13.436	108	170.4
ABS4-2A	Steeped	Present	1	25	8.04	0.204	33.244	1.556	4.1	0.984	6.636	29	23.584	105.2	197.6
ABS4-2A	Steeped	Present	2	23.596	5.888	0.124	29.608	0.62	1.92	0.44	2.98	9.86	10.884	82.4	135.6
ABS4-2A	Steeped	Present	3	23.132	5.788	0.104	29.024	0.272	1	0.228	1.5	9.58	14.172	114	168.4
ABS4-2B	Steeped	Present	1	16.64	4.02	0.056	20.716	0.868	2.68	0.604	4.156	14	14.468	64.4	118
ABS4-2B	Steeped	Present	2	23.272	6.94	0.268	30.48	2.656	8.32	1.74	12.716	44.836	30.124	64	182
ABS4-2B	Steeped	Present	3	19.804	4.416	0.052	24.272	0.528	1.924	0.464	2.916	14.976	16.312	73.6	132
ABS4-2C	Steeped	Present	1	15.952	3.664	0.044	19.66	0.084	0.568	0.096	0.748	4.636	7.34	81.6	114
ABS4-2C	Steeped	Present	2	21.552	8.836	0.26	30.648	2.796	7.804	2.096	12.696	41.916	23.884	63.6	172.8
ABS4-2C	Steeped	Present	3	18	4.784	0.056	22.84	0.472	2.656	0.576	3.7	22.836	19.476	82.4	151.2
ABS4-2D	Steeped	Present	1	20.5	4.664	0.288	25.452	0.356	2.768	0.836	3.956	7.192	8.232	41.6	86.4
ABS4-2D	Steeped	Present	2	28.312	8.856	0.42	37.588	3.08	10.6	2.484	16.16	34.084	16.964	29.2	134
ABS4-2D	Steeped	Present	3	23.024	5.6	0.212	28.836	0.904	3.404	0.868	5.18	9.428	8.676	39.2	91.2
NA indicates analyte was not detected (signal to noise ratio of peak below 3) or sample was missing (NA for all analytes)
Inositol phosphate concentrations reported as mg per 40 g of flour (200 g porridge serving)
Inositol phosphate species with an "_" followed by a number indicate isomers of the parent compound
"Total" columns represent the sum of all isomers of a given inositol phosphate species

## Sheet: 6
Event_Name	Rep	Treatment	Transgenic	Merged	IP6ToZn	IP6ToFe
Control	1	Steeped	Null	Steeped, Null	34.1672	14.2212
Control	2	Steeped	Null	Steeped, Null	16.539	13.8485
Control	3	Steeped	Null	Steeped, Null	22.7845	16.0803
Control	1	Non-steeped	Null	Non-steeped, Null	23.0059	9.5756
Control	2	Non-steeped	Null	Non-steeped, Null	16.8674	14.1235
Control	3	Non-steeped	Null	Non-steeped, Null	24.7597	17.4744
ABS4-1A	1	Steeped	Present	Steeped, Present	6.77582	6.56555
ABS4-1A	2	Steeped	Present	Steeped, Present	3.6317	2.86672
ABS4-1A	3	Steeped	Present	Steeped, Present	4.646	3.55894
ABS4-1A	1	Steeped	Null	Steeped, Null	16.5649	15.9221
ABS4-1A	2	Steeped	Null	Steeped, Null	17.8748	15.9026
ABS4-1A	3	Steeped	Null	Steeped, Null	25.5029	20.5263
ABS4-1A	1	Non-steeped	Present	Non-steeped, Present	24.1863	23.4358
ABS4-1A	2	Non-steeped	Present	Non-steeped, Present	25.5732	20.1865
ABS4-1A	3	Non-steeped	Present	Non-steeped, Present	19.7157	15.1027
ABS4-1A	1	Non-steeped	Null	Non-steeped, Null	21.2463	20.4218
ABS4-1A	2	Non-steeped	Null	Non-steeped, Null	21.9566	19.5341
ABS4-1A	3	Non-steeped	Null	Non-steeped, Null	24.6345	19.8274
ABS4-1B	1	Steeped	Present	Steeped, Present	7.38373	6.45907
ABS4-1B	2	Steeped	Present	Steeped, Present	7.49357	5.94939
ABS4-1B	3	Steeped	Present	Steeped, Present	6.79488	6.5697
ABS4-1B	1	Steeped	Null	Steeped, Null	17.7903	16.2974
ABS4-1B	2	Steeped	Null	Steeped, Null	21.5821	14.13
ABS4-1B	3	Steeped	Null	Steeped, Null	17.5899	13.0649
ABS4-1B	1	Non-steeped	Present	Non-steeped, Present	22.1247	19.354
ABS4-1B	2	Non-steeped	Present	Non-steeped, Present	23.8272	18.9172
ABS4-1B	3	Non-steeped	Present	Non-steeped, Present	16.8367	16.2787
ABS4-1B	1	Non-steeped	Null	Non-steeped, Null	22.43	20.5478
ABS4-1B	2	Non-steeped	Null	Non-steeped, Null	28.6214	18.7386
ABS4-1B	3	Non-steeped	Null	Non-steeped, Null	15.7127	11.6705
ABS4-1C	1	Steeped	Present	Steeped, Present	4.64937	4.52241
ABS4-1C	2	Steeped	Present	Steeped, Present	4.40308	3.05372
ABS4-1C	3	Steeped	Present	Steeped, Present	6.54106	3.57589
ABS4-1C	1	Steeped	Null	Steeped, Null	14.9235	13.6061
ABS4-1C	2	Steeped	Null	Steeped, Null	21.0551	21.335
ABS4-1C	3	Steeped	Null	Steeped, Null	12.8871	8.75962
ABS4-1C	1	Non-steeped	Present	Non-steeped, Present	25.3302	24.6385
ABS4-1C	2	Non-steeped	Present	Non-steeped, Present	29.7286	20.618
ABS4-1C	3	Non-steeped	Present	Non-steeped, Present	19.0902	10.4363
ABS4-1C	1	Non-steeped	Null	Non-steeped, Null	21.373	19.4862
ABS4-1C	2	Non-steeped	Null	Non-steeped, Null	27.0077	27.3667
ABS4-1C	3	Non-steeped	Null	Non-steeped, Null	22.5592	15.3338
ABS4-2A	1	Steeped	Present	Steeped, Present	4.6903	5.17536
ABS4-2A	2	Steeped	Present	Steeped, Present	4.35213	4.13938
ABS4-2A	3	Steeped	Present	Steeped, Present	6.40345	3.30849
ABS4-2A	1	Steeped	Null	Steeped, Null	14.0571	6.59937
ABS4-2A	2	Steeped	Null	Steeped, Null	15.9822	7.75109
ABS4-2A	3	Steeped	Null	Steeped, Null	18.3921	11.5864
ABS4-2A	1	Non-steeped	Present	Non-steeped, Present	16.425	18.1236
ABS4-2A	2	Non-steeped	Present	Non-steeped, Present	22.479	21.3801
ABS4-2A	3	Non-steeped	Present	Non-steeped, Present	20.873	10.7845
ABS4-2A	1	Non-steeped	Null	Non-steeped, Null	21.6645	10.1708
ABS4-2A	2	Non-steeped	Null	Non-steeped, Null	20.3045	9.8473
ABS4-2A	3	Non-steeped	Null	Non-steeped, Null	24.0558	15.1543
ABS4-2B	1	Steeped	Present	Steeped, Present	4.23372	3.96023
ABS4-2B	2	Steeped	Present	Steeped, Present	3.03244	4.38709
ABS4-2B	3	Steeped	Present	Steeped, Present	5.78598	4.51679
ABS4-2B	1	Steeped	Null	Steeped, Null	15.0289	12.3638
ABS4-2B	2	Steeped	Null	Steeped, Null	16.0304	14.3611
ABS4-2B	3	Steeped	Null	Steeped, Null	20.2239	14.2768
ABS4-2B	1	Non-steeped	Present	Non-steeped, Present	18.9597	17.7349
ABS4-2B	2	Non-steeped	Present	Non-steeped, Present	13.7786	19.9339
ABS4-2B	3	Non-steeped	Present	Non-steeped, Present	27.6721	21.602
ABS4-2B	1	Non-steeped	Null	Non-steeped, Null	17.571	14.4551
ABS4-2B	2	Non-steeped	Null	Non-steeped, Null	17.921	16.0549
ABS4-2B	3	Non-steeped	Null	Non-steeped, Null	22.1353	15.6261
ABS4-2C	1	Steeped	Present	Steeped, Present	5.81846	4.50461
ABS4-2C	2	Steeped	Present	Steeped, Present	3.83695	3.40693
ABS4-2C	3	Steeped	Present	Steeped, Present	4.74907	3.48897
ABS4-2C	1	Steeped	Null	Steeped, Null	19.8105	15.0209
ABS4-2C	2	Steeped	Null	Steeped, Null	18.1584	13.7993
ABS4-2C	3	Steeped	Null	Steeped, Null	19.9191	15.3406
ABS4-2C	1	Non-steeped	Present	Non-steeped, Present	22.6178	17.5106
ABS4-2C	2	Non-steeped	Present	Non-steeped, Present	20.4878	18.1917
ABS4-2C	3	Non-steeped	Present	Non-steeped, Present	14.7774	10.8565
ABS4-2C	1	Non-steeped	Null	Non-steeped, Null	26.1316	19.8138
ABS4-2C	2	Non-steeped	Null	Non-steeped, Null	24.1993	18.3901
ABS4-2C	3	Non-steeped	Null	Non-steeped, Null	18.9277	14.577
ABS4-2D	1	Steeped	Present	Steeped, Present	2.86883	1.94391
ABS4-2D	2	Steeped	Present	Steeped, Present	1.78201	1.66406
ABS4-2D	3	Steeped	Present	Steeped, Present	2.54864	2.18335
ABS4-2D	1	Steeped	Null	Steeped, Null	15.392	14.2276
ABS4-2D	2	Steeped	Null	Steeped, Null	15.5351	10.6961
ABS4-2D	3	Steeped	Null	Steeped, Null	14.187	10.1118
ABS4-2D	1	Non-steeped	Present	Non-steeped, Present	24.8264	16.8223
ABS4-2D	2	Non-steeped	Present	Non-steeped, Present	19.3825	18.0995
ABS4-2D	3	Non-steeped	Present	Non-steeped, Present	25.9285	22.2123
ABS4-2D	1	Non-steeped	Null	Non-steeped, Null	16.1221	14.9025
ABS4-2D	2	Non-steeped	Null	Non-steeped, Null	16.6274	11.4482
ABS4-2D	3	Non-steeped	Null	Non-steeped, Null	14.6801	10.4632
